# Supplementary material for: Prediction models of macro-nutrient content in plant organs of Cucumis melo in response to soil elements using support vector regression
Source: PeerJ. 2023 Oct 2;11:e15417. doi: 10.7717/peerj.15417 (PMC10552743; doi:10.7717/peerj.15417)
Supplement: Supplemental Information 16 — Input data sets such as nitrogen, phosphorus, and potassium in seeds, fruits, leaves, and roots to model. These datasets are used for statistical analysis to compare observed and predicted values. Fitting diagrams for predicted values compared to observed values of plant organs’ macro-nutrient content and regression line slope are presented in these figures. The scatter of dots in the figures indicates the models’ accuracy in predicting the output values. Likewise, the diagram for changes in plant organs’ macro-nutrient content in response to soil elements is presented in the figures. [file peerj-11-15417-s016.xlsx]

## Sheet: Soil Nitrogen
Replication	Fertilizers (A)	Vermicompost (B)	A × B	Soil Nitrogen		Fariman		Zahak		Replication	Fertilizers (A)	Vermicompost (B)	A × B	Soil Nitrogen			Fertilizers (A)	Vermicompost (B)	Soil Nitrogen	Seed Nitrogen	Fruit Nitrogen	Leaf Nitrogen	Root Nitrogen	Fruit Yield		Seed Nitrogen	Fruit Nitrogen	Leaf Nitrogen	Root Nitrogen	Fruit Yield																error (e)	abs(e)	e^2	abs(e)/Z
1	1	1	11	0.05			NT (%)			1	1	1	11	0.045			1	1	0.05	1.91786	0.892857	2.24393	0.735714	6.699		2.07118	1.14607	3.45486	1.10988	6.43631																-0.153323	0.153323	0.0235079	0.0740269
1	1	2	12	0.093						1	1	2	12	0.055			1	2	0.093	1.90714	1.16429	2.51	0.757143	4.074		1.96092	1.16859	2.5761	0.915059	5.82326																-0.0537745	0.0537745	0.0028917	0.0274231
1	1	3	13	0.068						1	1	3	13	0.025			1	3	0.068	1.85714	1.02143	3.54	1.35714	4.704		1.82485	1.07184	3.48932	1.30972	6.66397																0.0322912	0.0322912	0.00104272	0.0176952
1	1	4	14	0.067						1	1	4	14	0.075			1	4	0.067	2.1	1.1	2.30929	0.757143	4.032		2.58321	1.19883	2.49716	0.810396	5.67239																-0.483213	0.483213	0.233495	0.187059
1	2	1	21	0.074						1	2	1	21	0.085			2	1	0.074	1.97857	1.26429	3.03	0.928571	2.604		2.01731	1.29219	3.9631	1.17548	5.40496																-0.0387389	0.0387389	0.0015007	0.0192033
1	2	2	22	0.046						1	2	2	22	0.135			2	2	0.046	1.95714	0.95	2.87	1.07143	4.704		1.9098	0.997624	2.86289	1.01884	4.67259																0.0473397	0.0473397	0.00224104	0.0247877
1	2	3	23	0.081						1	2	3	23	0.135			2	3	0.081	1.83571	0.942857	3.26786	1.07143	4.83		1.80099	1.05055	3.32279	1.05294	4.33658																0.034728	0.034728	0.00120603	0.0192828
1	2	4	24	0.086						1	2	4	24	0.095			2	4	0.086	1.81429	0.907143	2.57	1.07143	5.124		2.09632	1.14136	2.7613	0.811909	5.08952																-0.282032	0.282032	0.0795421	0.134537
1	3	1	31	0.068						1	3	1	31	0.135			3	1	0.068	1.46429	0.892857	2.39643	0.785714	3.024		1.58132	0.940121	2.37426	0.766554	4.46138																-0.117037	0.117037	0.0136976	0.074012
1	3	2	32	0.072						1	3	2	32	0.025			3	2	0.072	1.90786	1.02143	2.24393	0.735714	4.221		2.0059	1.03023	2.34081	0.790026	6.62557																-0.098045	0.098045	0.00961282	0.0488783
1	3	3	33	0.067						1	3	3	33	0.095			3	3	0.067	1.89786	0.857143	2.44	0.8	2.604		1.95071	0.911118	2.49123	0.749091	5.27192																-0.0528542	0.0528542	0.00279357	0.0270949
1	3	4	34	0.065						1	3	4	34	0.075			3	4	0.065	1.95714	1.33571	2.39643	0.785714	3.654		1.97233	1.20168	2.24191	0.73998	5.6916																-0.0151913	0.0151913	0.000230775	0.00770219
1	4	1	41	0.063						1	4	1	41	0.125			4	1	0.063	1.83571	1.14286	3.26786	1.07143	4.704		1.78954	1.11646	3.21868	1.12109	4.70962																0.0461786	0.0461786	0.00213247	0.0258048
1	4	2	42	0.075						1	4	2	42	0.125			4	2	0.075	1.62857	1.14286	2.92	1.28571	4.83		1.71198	1.1589	2.97092	0.893781	4.59442																-0.0834112	0.0834112	0.00695743	0.048722
1	4	3	43	0.068						1	4	3	43	0.125			4	3	0.068	2.03571	0.864286	2.83214	0.928571	5.124		1.97149	0.911113	2.77843	0.980943	4.66162																0.0642275	0.0642275	0.00412517	0.0325782
1	4	4	44	0.05						1	4	4	44	0.085			4	4	0.05	1.50714	1.35714	2.68	0.714286	4.704		1.56184	1.34011	2.73047	0.800003	5.63537																-0.0546963	0.0546963	0.00299169	0.0350205
1	5	1	51	0.06						1	5	1	51	0.095			5	1	0.06	1.65	1.09286	2.92	1.28571	4.704		1.62928	1.08882	2.9714	0.980606	5.33913																0.0207223	0.0207223	0.000429412	0.0127187
1	5	2	52	0.07						1	5	2	52	0.115			5	2	0.07	1.83571	1	2.59	0.735714	5.124		1.81066	0.949177	2.53945	0.790314	4.84265																0.025052	0.025052	0.000627601	0.0138358
1	5	3	53	0.08						1	5	3	53	0.125			5	3	0.08	1.93571	1.28571	2.92	1.28571	5.649		1.94034	1.3401	3.21941	1.12005	4.54641																-0.00462436	0.00462436	2.13847e-05	0.00238328
1	5	4	54	0.07						1	5	4	54	0.135			5	4	0.07	1.88571	0.928571	3.11	0.857143	3.654		1.86161	0.929013	2.96257	0.809995	4.44218																0.0241078	0.0241078	0.000581188	0.01295
1	6	1	61	0.08						1	6	1	61	0.125			6	1	0.08	1.81429	0.907143	3.18	0.714286	3.654		1.86005	0.899986	3.06764	0.97555	4.54641																-0.0457637	0.0457637	0.00209431	0.0246035
1	6	2	62	0.1						1	6	2	62	0.065			6	2	0.1	1.74286	1	2.77	0.742857	3.654		1.68852	0.677559	2.46092	0.711769	5.55582																0.0543383	0.0543383	0.00295265	0.032181
1	6	3	63	0.07						1	6	3	63	0.055			6	3	0.07	1.50714	0.857143	2.97	1.07143	4.074		1.96008	0.973523	3.84479	1.12157	6.04406																-0.45294	0.45294	0.205155	0.231082
1	6	4	64	0.06						1	6	4	64	0.085			6	4	0.06	1.83571	0.907143	3.02	1.28571	3.654		1.78952	0.858642	3.0704	1.23839	5.53936																0.0461919	0.0461919	0.00213369	0.0258124
2	1	1	11	0.084						2	1	1	11	0.045			1	1	0.084	1.93571	0.914286	2.17857	0.714286	4.683		1.88873	0.858956	2.12933	0.659035	6.10989																0.0469815	0.0469815	0.00220726	0.0248746
2	1	2	12	0.103						2	1	2	12	0.055			1	2	0.103	1.83571	1.09286	2.55	1	4.704		1.85072	1.14012	2.49864	0.948521	5.72725																-0.0150035	0.0150035	0.000225104	0.00810683
2	1	3	13	0.069						2	1	3	13	0.03			1	3	0.069	1.77143	1.14286	3.61	1.41429	5.124		1.81442	1.07018	3.51263	1.32105	6.55425																-0.0429896	0.0429896	0.00184811	0.0236933
2	1	4	14	0.079						2	1	4	14	0.075			1	4	0.079	2.07143	1.16429	2.22214	0.728571	3.591		2.27925	1.18531	2.42327	0.797305	5.55719																-0.207821	0.207821	0.0431896	0.0911796
2	2	1	21	0.061						2	2	1	21	0.095			2	1	0.061	1.89286	1.28571	3.18	0.714286	3.024		1.83877	1.27174	3.01118	0.761703	5.32953																0.0540895	0.0540895	0.00292567	0.0294162
2	2	2	22	0.055						2	2	2	22	0.125			2	2	0.055	1.85714	1	2.87	1.07143	5.754		1.93555	1.04077	2.92041	1.03003	4.78642																-0.0784064	0.0784064	0.00614756	0.0405086
2	2	3	23	0.061						2	2	3	23	0.125			2	3	0.061	1.65	0.95	3.21	0.857143	5.103		1.59883	0.899124	3.05943	0.911413	4.72882																0.051168	0.051168	0.00261816	0.0320033
2	2	4	24	0.075						2	2	4	24	0.095			2	4	0.075	1.88571	1	2.53	0.714286	6.174		2.00408	0.959089	2.60541	0.760872	5.19512																-0.118369	0.118369	0.0140113	0.0590641
2	3	1	31	0.05						2	3	1	31	0.135			3	1	0.05	1.44286	0.878571	2.17857	0.714286	5.754		1.38907	0.907049	2.23184	0.743136	4.63419																0.0537836	0.0537836	0.00289268	0.038719
2	3	2	32	0.079						2	3	2	32	0.03			3	2	0.079	2	0.942857	2.35286	0.771429	4.494		1.96583	0.990268	2.29921	0.785936	6.45825																0.0341684	0.0341684	0.00116748	0.0173812
2	3	3	33	0.094						2	3	3	33	0.085			3	3	0.094	1.91429	1.07143	2.2875	0.75	3.654		2.15156	1.20773	4.92815	1.5607	5.21295																-0.237278	0.237278	0.0563008	0.110282
2	3	4	34	0.062						2	3	4	34	0.075			3	4	0.062	1.91429	1.14286	2.20036	0.721429	6.804		1.86	1.19045	2.14959	0.705724	5.7204																0.0542863	0.0542863	0.002947	0.0291862
2	4	1	41	0.055						2	4	1	41	0.125			4	1	0.055	1.94286	1.14286	3.14	1.35714	5.754		1.69471	1.0888	3.12062	1.10717	4.78642																0.248146	0.248146	0.0615766	0.146424
2	4	2	42	0.068						2	4	2	42	0.125			4	2	0.068	1.54286	1.14286	3.22	0.728571	5.103		1.59039	1.08842	2.89448	0.861339	4.66162																-0.0475312	0.0475312	0.00225921	0.0298865
2	4	3	43	0.094						2	4	3	43	0.125			4	3	0.094	1.87143	0.857143	3.27	0.742857	6.174		2.33893	1.24792	3.79633	1.26563	4.41201																-0.4675	0.4675	0.218556	0.199878
2	4	4	44	0.05						2	4	4	44	0.095			4	4	0.05	1.58571	1.28571	2.79	0.75	5.124		1.56184	1.34011	2.73047	0.800003	5.43513																0.0238751	0.0238751	0.000570021	0.0152865
2	5	1	51	0.06						2	5	1	51	0.085			5	1	0.06	1.57143	1.14286	3.31	0.757143	5.754		1.62928	1.08882	2.9714	0.980606	5.53936																-0.0578492	0.0578492	0.00334653	0.035506
2	5	2	52	0.07						2	5	2	52	0.125			5	2	0.07	1.75571	1	2.53	0.714286	6.174		1.81066	0.949177	2.53945	0.790314	4.64242																-0.054948	0.054948	0.00301929	0.0303469
2	5	3	53	0.08						2	5	3	53	0.135			5	3	0.08	1.88571	1.35714	3.22	0.728571	3.633		1.94034	1.3401	3.21941	1.12005	4.34618																-0.0546244	0.0546244	0.00298382	0.028152
2	5	4	54	0.06						2	5	4	54	0.135			5	4	0.06	1.95857	0.907143	2.92	1.28571	4.074		1.80454	0.858236	2.86993	0.808388	4.53819																0.154036	0.154036	0.0237271	0.0853605
2	6	1	61	0.08						2	6	1	61	0.115			6	1	0.08	1.89286	0.95	2.92	1.28571	4.704		1.86005	0.899986	3.06764	0.97555	4.74665																0.0328078	0.0328078	0.00107635	0.0176381
2	6	2	62	0.09						2	6	2	62	0.055			6	2	0.09	1.90714	0.857143	2.49	1.14286	4.704		1.94148	0.911485	2.62904	0.761077	5.85206																-0.0343376	0.0343376	0.00117907	0.0176863
2	6	3	63	0.08						2	6	3	63	0.055			6	3	0.08	1.57143	0.857143	3.14	0.735714	5.124		1.60788	0.711223	3.08953	0.790326	5.94806																-0.0364558	0.0364558	0.00132903	0.0226732
2	6	4	64	0.07						2	6	4	64	0.095			6	4	0.07	1.75	0.807143	3.19	0.75	4.704		1.9921	1.11735	3.23394	1.13723	5.24312																-0.242102	0.242102	0.0586133	0.121531
3	1	1	11	0.071						3	1	1	11	0.055			1	1	0.071	1.83571	0.907143	2.2875	0.75	4.788		1.95658	0.967504	2.63475	0.827287	6.03446																-0.120862	0.120862	0.0146076	0.0617721
3	1	2	12	0.054						3	1	2	12	0.045			1	2	0.054	1.7	1.19286	2.52	0.728571	5.124		2.39839	1.28287	2.87715	0.80727	6.3979																-0.698394	0.698394	0.487754	0.291192
3	1	3	13	0.079						3	1	3	13	0.025			1	3	0.079	1.76429	1.05	3.54	0.735714	6.174		1.70991	1.05316	3.74466	1.43199	6.55837																0.0543771	0.0543771	0.00295687	0.0318012
3	1	4	14	0.095						3	1	4	14	0.085			1	4	0.095	1.54286	1.09286	2.26571	0.742857	4.557		1.87281	1.16571	2.32189	0.775067	5.20335																-0.329955	0.329955	0.10887	0.176182
3	2	1	21	0.063						3	2	1	21	0.085			2	1	0.063	1.87143	1.28571	2.94	1.35714	2.814		1.86581	1.27473	3.15749	0.825102	5.51056																0.00561562	0.00561562	3.15352e-05	0.00300975
3	2	2	22	0.0711						3	2	2	22	0.135			2	2	0.0711	2.03571	1.07143	2.98	0.714286	5.754		1.9883	1.12016	3.0268	1.05692	4.43162																0.0474165	0.0474165	0.00224833	0.0238478
3	2	3	23	0.077						3	2	3	23	0.115			2	3	0.077	1.67143	0.978571	3.32	1.28571	4.62		1.76024	1.02035	3.2697	1.02584	4.77545																-0.088807	0.088807	0.00788668	0.0504518
3	2	4	24	0.066						3	2	4	24	0.095			2	4	0.066	1.97857	0.857143	2.53	0.714286	4.704		1.92843	0.809754	2.47873	0.716932	5.28153																0.0501442	0.0501442	0.00251444	0.0260026
3	3	1	31	0.056						3	3	1	31	0.135			3	1	0.056	1.48571	0.871429	2.44	0.8	6.174		1.45106	0.917073	2.27873	0.749991	4.57659																0.0346499	0.0346499	0.00120062	0.023879
3	3	2	32	0.068						3	3	2	32	0.025			3	2	0.068	2.07857	1.05	2.39643	0.785714	4.074		2.03	1.05365	2.3654	0.792927	6.66397																0.0485746	0.0485746	0.00235949	0.0239284
3	3	3	33	0.071						3	3	3	33	0.095			3	3	0.071	1.86429	0.907143	2.37464	0.778571	3.654		1.97952	0.954506	2.85094	0.868763	5.23352																-0.11523	0.11523	0.0132781	0.0582114
3	3	4	34	0.074						3	3	4	34	0.085			3	4	0.074	1.8	1.14286	2.44	0.8	5.754		2.30922	1.23573	2.51961	0.843151	5.40496																-0.509219	0.509219	0.259304	0.220516
3	4	1	41	0.081						3	4	1	41	0.115			4	1	0.081	1.91429	1	3.18	0.714286	5.754		2.01314	1.1852	3.44076	1.16125	4.73705																-0.098856	0.098856	0.00977252	0.0491054
3	4	2	42	0.072						3	4	2	42	0.125			4	2	0.072	1.71429	1.07143	2.83214	0.928571	4.62		1.65961	1.12853	2.93802	0.87977	4.62322																0.0546746	0.0546746	0.00298932	0.0329443
3	4	3	43	0.065						3	4	3	43	0.115			4	3	0.065	1.97857	1.14286	2.7	1.21429	4.704		1.92977	0.873245	2.66157	0.950899	4.89065																0.048803	0.048803	0.00238173	0.0252895
3	4	4	44	0.05						3	4	4	44	0.085			4	4	0.05	1.58571	1.28571	2.27	1.07143	6.174		1.56184	1.34011	2.73047	0.800003	5.63537																0.0238751	0.0238751	0.000570021	0.0152865
3	5	1	51	0.06						3	5	1	51	0.095			5	1	0.06	1.63214	1	2.83214	0.928571	5.754		1.62928	1.08882	2.9714	0.980606	5.33913																0.00286512	0.00286512	8.20893e-06	0.00175852
3	5	2	52	0.07						3	5	2	52	0.115			5	2	0.07	1.91429	0.857143	2.57	1.07143	4.704		1.81066	0.949177	2.53945	0.790314	4.84265																0.103623	0.103623	0.0107378	0.0572296
3	5	3	53	0.08						3	5	3	53	0.125			5	3	0.08	1.83571	1.28571	3.26786	1.07143	3.738		1.94034	1.3401	3.21941	1.12005	4.54641																-0.104624	0.104624	0.0109463	0.0539207
3	5	4	54	0.07						3	5	4	54	0.125			5	4	0.07	1.81429	0.857143	2.74	0.735714	5.124		1.86161	0.929013	2.96257	0.809995	4.64242																-0.0473207	0.0473207	0.00223925	0.0254193
3	6	1	61	0.07						3	6	1	61	0.115			6	1	0.07	1.72857	0.807143	3.26786	1.07143	4.704		1.68912	0.78427	3.21994	1.01997	4.84265																0.0394469	0.0394469	0.00155606	0.0233535
3	6	2	62	0.09						3	6	2	62	0.065			6	2	0.09	1.89286	0.785714	2.68	0.714286	4.704		1.94148	0.911485	2.62904	0.761077	5.65182																-0.0486234	0.0486234	0.00236423	0.0250445
3	6	3	63	0.07						3	6	3	63	0.055			6	3	0.07	1.44857	0.857143	3.1	1.21429	3.654		1.96008	0.973523	3.84479	1.12157	6.04406																-0.511512	0.511512	0.261644	0.260964
3	6	4	64	0.07						3	6	4	64	0.085			6	4	0.07	1.75	0.892857	3.05	1	4.704		1.9921	1.11735	3.23394	1.13723	5.44336																-0.242102	0.242102	0.0586133	0.121531
																	1	1	0.045	2.08	1.223	3.74235	1.227	2.6817		2.09937	1.18914	3.65067	1.17907	3.0859																-0.0193681	0.0193681	0.000375124	0.00922569
																	1	2	0.055	2.81	1.5602	2.92	0.86	2.1189		2.38703	1.27988	2.86946	0.809578	2.79197																0.422969	0.422969	0.178903	0.177195
																	1	3	0.025	2.22	0.931	2.4156	0.792	2.5977		2.27009	1.13698	2.47068	0.783303	3.19505																-0.0500929	0.0500929	0.0025093	0.0220665
																	1	4	0.075	2.56	1.329	2.623	0.86	1.8669		2.38066	1.18993	2.44811	0.802011	2.71964																0.179341	0.179341	0.0321631	0.0753324
																	2	1	0.085	2.09	1.2604	5.2948	1.736	2.1525		2.17343	1.31143	4.77	1.52855	2.59142																-0.0834295	0.0834295	0.00696049	0.0383861
																	2	2	0.135	2.38	1.407	3.47	1.3	2.1777		2.28169	1.46174	3.49149	1.24926	2.24028																0.0983147	0.0983147	0.00966579	0.0430886
																	2	3	0.135	2.21	1.302	4.11445	1.349	2.2365		2.36586	1.45254	4.0584	1.35852	2.07918																-0.155858	0.155858	0.0242916	0.0658779
																	2	4	0.095	2.26	1.373	2.97	1.3	2.373		2.17157	1.29025	2.88968	0.851464	2.44018																0.0884267	0.0884267	0.00781928	0.0407201
																	3	1	0.135	2.41	1.232	3.0012	0.984	2.4507		2.46046	1.14178	2.94816	0.928109	2.13902																-0.0504631	0.0504631	0.00254653	0.0205096
																	3	2	0.025	2.21	1.435	2.5315	0.83	1.9551		2.3437	1.33163	2.66753	0.849974	3.17664																-0.133698	0.133698	0.0178752	0.0570458
																	3	3	0.095	2.81	1.26	5.07	1.792	1.638		2.15929	1.21888	5.01877	1.59091	2.52763																0.65071	0.65071	0.423424	0.301354
																	3	4	0.075	2.86	1.27	2.745	0.9	2.5326		2.34664	1.23955	2.55053	0.85465	2.72885																0.513362	0.513362	0.26354	0.218765
																	4	1	0.125	2.67	1.37	3.94	1.259	2.1777		2.61856	1.39059	3.99066	1.3104	2.25804																0.0514366	0.0514366	0.00264573	0.0196431
																	4	2	0.125	2.94	1.75	3.58	1.6	2.2365		2.64115	1.70158	3.55097	1.15023	2.2028																0.298847	0.298847	0.0893093	0.11315
																	4	3	0.125	2.74	1.55	5.07	1.761	2.373		2.79023	1.66889	5.01967	1.66096	2.23502																-0.0502318	0.0502318	0.00252323	0.0180027
																	4	4	0.085	2.54	1.66	2.94	0.8	2.1777		2.48816	1.61712	2.97221	0.851897	2.70189																0.051838	0.051838	0.00268718	0.0208338
																	5	1	0.095	2.671	1.89	5.04	1.718	2.1777		2.76965	1.94118	4.9886	1.66939	2.55985																-0.0986451	0.0986451	0.00973085	0.0356165
																	5	2	0.115	2.74	1.45	3.03	0.83	2.4066		2.57124	1.45642	2.97866	0.842144	2.32182																0.168761	0.168761	0.0284802	0.065634
																	5	3	0.125	2.28	1.44	4.1053	1.346	2.1945		2.16028	1.43979	3.8815	1.29995	2.17979																0.11972	0.11972	0.0143329	0.0554187
																	5	4	0.135	2.11	1.39	3.45	1	1.6926		2.22278	1.44176	3.53007	1.05	2.12981																-0.112776	0.112776	0.0127184	0.0507364
																	6	1	0.125	2.57	1.37	2.2387	0.734	1.7325		2.62185	1.42001	2.35669	0.780026	2.17979																-0.0518519	0.0518519	0.00268862	0.0197768
																	6	2	0.065	2.64	1.55	3.06	0.84	1.6926		2.57479	1.49851	3.05031	0.890823	2.66375																0.0652101	0.0652101	0.00425236	0.0253264
																	6	3	0.055	2.44	1.32	4.93185	1.617	1.8858		2.49	1.37	4.98047	1.62309	2.89784																-0.0500002	0.0500002	0.00250002	0.0200804
																	6	4	0.085	2.57	1.99	3.68	1.6	1.6926		2.29683	1.50857	3.47873	0.992862	2.65586																0.273174	0.273174	0.074624	0.118935
																	1	1	0.045	2.15	1.243	3.60205	1.181	2.3772		2.09937	1.18914	3.65067	1.17907	2.9294																0.0506319	0.0506319	0.00256359	0.0241177
																	1	2	0.055	2.71	1.3276	2.96	1.2	2.1777		2.38703	1.27988	2.86946	0.809578	2.74594																0.322969	0.322969	0.104309	0.135302
																	1	3	0.03	2.84	1.079	2.73585	0.897	2.373		2.21869	1.13006	2.59069	0.848377	3.14245																0.621309	0.621309	0.386025	0.280034
																	1	4	0.075	2.45	1.244	2.501	0.82	2.0832		2.38066	1.18993	2.44811	0.802011	2.66441																0.0693408	0.0693408	0.00480814	0.0291267
																	2	1	0.095	2.37	1.282	5.4778	1.796	2.0223		2.31933	1.33047	5.50439	1.85165	2.55525																0.0506688	0.0506688	0.00256733	0.0218463
																	2	2	0.125	2.17	1.447	3.47	1.3	2.6649		2.22698	1.40561	3.41446	1.21026	2.29486																-0.0569805	0.0569805	0.00324678	0.0255864
																	2	3	0.125	2.31	1.432	3.82775	1.255	2.3625		2.25927	1.37898	3.91968	1.31049	2.26724																0.0507327	0.0507327	0.00257381	0.0224554
																	2	4	0.095	2.12	1.244	2.94	0.8	2.4381		2.17157	1.29025	2.88968	0.851464	2.49081																-0.0515733	0.0515733	0.0026598	0.0237493
																	3	1	0.135	2.84	1.135	2.6047	0.854	2.2449		2.46046	1.14178	2.94816	0.928109	2.22187																0.379537	0.379537	0.144048	0.154254
																	3	2	0.03	2.54	1.339	2.684	0.88	2.0811		2.30211	1.29687	2.62889	0.840921	3.09642																0.237894	0.237894	0.0565934	0.103337
																	3	3	0.085	2.6	1.21	5.0386	1.652	1.9257		2.08294	1.1079	4.11364	1.28923	2.49936																0.517055	0.517055	0.267346	0.248233
																	3	4	0.075	2.86	1.29	2.4705	0.81	2.52		2.34664	1.23955	2.55053	0.85465	2.74266																0.513362	0.513362	0.26354	0.218765
																	4	1	0.125	2.57	1.4	3.94	1.258	2.6649		2.61856	1.39059	3.99066	1.3104	2.29486																-0.0485634	0.0485634	0.0023584	0.0185458
																	4	2	0.125	2.9	1.65	3.5	0.82	2.3625		2.64115	1.70158	3.55097	1.15023	2.23502																0.258847	0.258847	0.0670016	0.0980052
																	4	3	0.125	2.6	1.72	4.90745	1.609	2.8581		2.79023	1.66889	5.01967	1.66096	2.11535																-0.190232	0.190232	0.0361881	0.0681778
																	4	4	0.095	2.64	1.75	3.09	0.85	2.373		2.75107	1.69979	3.03953	0.880339	2.60588																-0.11107	0.11107	0.0123366	0.0403734
																	5	1	0.085	2.8	1.92	5.063	1.66	2.6649		2.44253	1.69685	4.41464	1.47276	2.65586																0.357473	0.357473	0.127787	0.146354
																	5	2	0.125	2.68	1.52	2.94	0.8	2.8581		2.74409	1.57165	3.07623	0.851587	2.22582																-0.0640942	0.0640942	0.00410807	0.0233571
																	5	3	0.135	2.16	1.45	3.98025	1.305	2.0391		2.21156	1.46765	4.03059	1.35437	2.08378																-0.0515597	0.0515597	0.0026584	0.0233137
																	5	4	0.135	2.22	1.52	3.48	1.6	1.8858		2.22278	1.44176	3.53007	1.05	2.17584																-0.00277567	0.00277567	7.70437e-06	0.00124874
																	6	1	0.115	2.458	1.35	2.5498	0.836	2.1777		2.4537	1.30465	2.51816	0.822797	2.27579																0.00429562	0.00429562	1.84523e-05	0.00175067
																	6	2	0.055	2.742	1.44	3.27	1.4	2.1777		2.82833	1.73401	3.21906	0.945245	2.80578																-0.0863264	0.0863264	0.00745224	0.0305221
																	6	3	0.055	2.67	1.62	5.32	1.547	2.373		2.49	1.37	4.98047	1.62309	2.85181																0.18	0.18	0.0323999	0.0722891
																	6	4	0.095	2.45	1.72	3.59	0.85	2.1777		2.50048	1.77136	3.6415	0.901613	2.51383																-0.0504775	0.0504775	0.00254798	0.0201871
																	1	1	0.055	2.2	1.22	3.67525	1.205	2.4276		2.04334	1.1032	3.25924	1.04141	2.89323																0.156663	0.156663	0.0245433	0.0766702
																	1	2	0.045	2.45	1.271	2.9	0.82	2.373		2.50098	1.30995	2.94628	0.787586	3.06749																-0.0509819	0.0509819	0.00259915	0.0203847
																	1	3	0.025	2.15	1.722	2.17465	0.713	2.4381		2.27009	1.13698	2.47068	0.783303	3.14442																-0.120093	0.120093	0.0144223	0.0529022
																	1	4	0.085	2.61	1.227	2.562	0.84	1.6905		2.12698	1.17817	2.38563	0.789605	2.49476																0.48302	0.48302	0.233309	0.227092
																	2	1	0.085	2.22	1.4084	4.82205	1.581	1.9866		2.17343	1.31143	4.77	1.52855	2.64205																0.0465705	0.0465705	0.00216881	0.0214272
																	2	2	0.135	2.31	1.7002	3.44	0.8	2.6649		2.28169	1.46174	3.49149	1.24926	2.12475																0.0283147	0.0283147	0.000801724	0.0124096
																	2	3	0.115	2.21	1.435	3.7637	1.234	2.1399		2.15355	1.30498	3.78205	1.25854	2.2896																0.056449	0.056449	0.00318649	0.0262121
																	2	4	0.095	2.94	1.3	2.94	0.8	2.5977		2.17157	1.29025	2.88968	0.851464	2.53224																0.768427	0.768427	0.59048	0.353857
																	3	1	0.135	2.41	1.093	2.9707	0.974	2.2281		2.46046	1.14178	2.94816	0.928109	2.19425																-0.0504631	0.0504631	0.00254653	0.0205096
																	3	2	0.025	2.78	1.278	2.745	0.9	2.4066		2.3437	1.33163	2.66753	0.849974	3.19505																0.436302	0.436302	0.190359	0.18616
																	3	3	0.095	2.21	1.27	5.09	1.539	2.0223		2.15929	1.21888	5.01877	1.59091	2.50922																0.05071	0.05071	0.00257151	0.0234846
																	3	4	0.085	2.03	1.28	2.806	0.92	2.6649		2.72065	1.27808	2.86041	0.97002	2.59142																-0.690653	0.690653	0.477002	0.253856
																	4	1	0.115	2.38	1.39	4.08	1.402	2.6649		2.47373	1.3393	3.86493	1.27021	2.27119																-0.0937291	0.0937291	0.00878515	0.0378898
																	4	2	0.125	2.16	1.79	3.66	1.1	2.4066		2.64115	1.70158	3.55097	1.15023	2.21661																-0.481153	0.481153	0.231509	0.182175
																	4	3	0.115	2.85	1.59	5.07	1.564	2.1777		2.64314	1.53086	4.62411	1.5269	2.34483																0.206863	0.206863	0.0427921	0.078264
																	4	4	0.085	2.77	1.65	2.97	1.3	2.8581		2.48816	1.61712	2.97221	0.851897	2.70189																0.281838	0.281838	0.0794327	0.113272
																	5	1	0.095	2.91	1.92	4.84	1.52	2.6649		2.76965	1.94118	4.9886	1.66939	2.55985																0.140355	0.140355	0.0196995	0.0506761
																	5	2	0.115	2.52	1.62	2.97	1.3	2.1777		2.57124	1.45642	2.97866	0.842144	2.32182																-0.0512392	0.0512392	0.00262545	0.0199278
																	5	3	0.125	2.4	1.49	3.8369	1.258	1.9425		2.16028	1.43979	3.8815	1.29995	2.17979																0.23972	0.23972	0.0574657	0.110967
																	5	4	0.125	2.22	1.32	3.53	0.83	2.373		2.16839	1.35709	3.44685	0.987285	2.22582																0.0516054	0.0516054	0.00266312	0.0237989
																	6	1	0.115	2.68	1.34	2.5742	0.844	2.4066		2.4537	1.30465	2.51816	0.822797	2.32182																0.226296	0.226296	0.0512097	0.0922261
																	6	2	0.065	2.54	1.59	2.94	0.8	2.1777		2.57479	1.49851	3.05031	0.890823	2.70978																-0.0347899	0.0347899	0.00121034	0.0135117
																	6	3	0.055	2.65	1.39	5.13	1.878	2.1189		2.49	1.37	4.98047	1.62309	2.89784																0.16	0.16	0.0255999	0.064257
																	6	4	0.085	2.45	1.72	3.86	1.2	2.4066		2.29683	1.50857	3.47873	0.992862	2.60983																0.153174	0.153174	0.0234622	0.0666894
																	2	2	0.05	1.88535	1.1119	2.89168	0.910856	4.97082		1.88535	1.1119	2.89168	0.910856	4.97082																0	0	0	0
																	2	2	0.2	2.66822	1.54718	3.77099	1.18169	4.68281		2.66822	1.54718	3.77099	1.18169	4.68281																0	0	0	0
																	2	2	0.35	3.45133	1.98257	4.65011	1.45238	4.3948	K_VC=2,2	3.45133	1.98257	4.65011	1.45238	4.3948																0	0	0	0
																	2	2	0.5	4.23464	2.41807	5.52903	1.72293	4.10679	K_VC=2,4	4.23464	2.41807	5.52903	1.72293	4.10679																0	0	0	0
																	2	2	0.65	5.01809	2.85364	6.40773	1.99332	3.81878	K_VC=4,2	5.01809	2.85364	6.40773	1.99332	3.81878																0	0	0	0
														0.05			2	2	0.8	5.80164	3.28928	7.28617	2.26355	3.53077	K_VC=4,4	5.80164	3.28928	7.28617	2.26355	3.53077																0	0	0	0
														0.2			2	2	0.95	6.58525	3.72496	8.16434	2.53362	3.24276	K_VC=6,2	6.58525	3.72496	8.16434	2.53362	3.24276																0	0	0	0
														0.35			2	2	1.1	7.36887	4.16067	9.04222	2.80351	2.95475	K_VC=6,4	7.36887	4.16067	9.04222	2.80351	2.95475																0	0	0	0
														0.5			2	4	0.05	1.93647	1.11833	2.52878	0.767877	4.97082		1.93647	1.11833	2.52878	0.767877	4.97082																0	0	0	0
														0.65			2	4	0.2	2.71597	1.55316	3.40844	1.03891	4.68281		2.71597	1.55316	3.40844	1.03891	4.68281																0	0	0	0
														0.8			2	4	0.35	3.49572	1.98811	4.28791	1.30981	4.3948		3.49572	1.98811	4.28791	1.30981	4.3948																0	0	0	0
														0.95			2	4	0.5	4.27565	2.42316	5.16719	1.58056	4.10679		4.27565	2.42316	5.16719	1.58056	4.10679																0	0	0	0
														1.1			2	4	0.65	5.05573	2.85829	6.04624	1.85115	3.81878		5.05573	2.85829	6.04624	1.85115	3.81878																0	0	0	0
																	2	4	0.8	5.83591	3.29348	6.92505	2.12159	3.53077		5.83591	3.29348	6.92505	2.12159	3.53077																0	0	0	0
																	2	4	0.95	6.61615	3.72871	7.80358	2.39186	3.24276		6.61615	3.72871	7.80358	2.39186	3.24276																0	0	0	0
																	2	4	1.1	7.3964	4.16398	8.68183	2.66196	2.95475		7.3964	4.16398	8.68183	2.66196	2.95475																0	0	0	0
																	4	2	0.05	1.86498	1.12141	2.92262	0.949516	4.97082		1.86498	1.12141	2.92262	0.949516	4.97082																0	0	0	0
																	4	2	0.2	2.65386	1.5584	3.80206	1.21998	4.68281		2.65386	1.5584	3.80206	1.21998	4.68281																0	0	0	0
																	4	2	0.35	3.44296	1.9955	4.68131	1.49031	4.3948		3.44296	1.9955	4.68131	1.49031	4.3948																0	0	0	0
																	4	2	0.5	4.23226	2.4327	5.56036	1.76049	4.10679		4.23226	2.4327	5.56036	1.76049	4.10679																0	0	0	0
																	4	2	0.65	5.02171	2.86998	6.43919	2.03052	3.81878		5.02171	2.86998	6.43919	2.03052	3.81878																0	0	0	0
																	4	2	0.8	5.81126	3.30733	7.31776	2.30039	3.53077		5.81126	3.30733	7.31776	2.30039	3.53077																0	0	0	0
																	4	2	0.95	6.60086	3.74471	8.19606	2.57008	3.24276		6.60086	3.74471	8.19606	2.57008	3.24276																0	0	0	0
																	4	2	1.1	7.39047	4.18213	9.07407	2.83961	2.95475		7.39047	4.18213	9.07407	2.83961	2.95475																0	0	0	0
																	4	4	0.05	1.85718	1.19325	2.78291	0.869735	4.97082		1.85718	1.19325	2.78291	0.869735	4.97082																0	0	0	0
																	4	4	0.2	2.64267	1.62979	3.6627	1.1404	4.68281		2.64267	1.62979	3.6627	1.1404	4.68281																0	0	0	0
																	4	4	0.35	3.42839	2.06644	4.54231	1.41093	4.3948		3.42839	2.06644	4.54231	1.41093	4.3948																0	0	0	0
																	4	4	0.5	4.21431	2.50319	5.42171	1.68132	4.10679		4.21431	2.50319	5.42171	1.68132	4.10679																0	0	0	0
																	4	4	0.65	5.00038	2.94002	6.30089	1.95155	3.81878		5.00038	2.94002	6.30089	1.95155	3.81878																0	0	0	0
																	4	4	0.8	5.78655	3.37691	7.17981	2.22162	3.53077		5.78655	3.37691	7.17981	2.22162	3.53077																0	0	0	0
																	4	4	0.95	6.57277	3.81384	8.05847	2.49152	3.24276		6.57277	3.81384	8.05847	2.49152	3.24276																0	0	0	0
																	4	4	1.1	7.35901	4.2508	8.93683	2.76125	2.95475		7.35901	4.2508	8.93683	2.76125	2.95475																0	0	0	0
																	6	2	0.05	1.88486	1.1384	2.95765	1.01785	4.97082		1.88486	1.1384	2.95765	1.01785	4.97082																0	0	0	0
																	6	2	0.2	2.677	1.57606	3.83586	1.28753	4.68281		2.677	1.57606	3.83586	1.28753	4.68281																0	0	0	0
																	6	2	0.35	3.46939	2.01384	4.71389	1.55708	4.3948		3.46939	2.01384	4.71389	1.55708	4.3948																0	0	0	0
																	6	2	0.5	4.26196	2.45171	5.59172	1.82648	4.10679		4.26196	2.45171	5.59172	1.82648	4.10679																0	0	0	0
																	6	2	0.65	5.05468	2.88966	6.46932	2.09572	3.81878		5.05468	2.88966	6.46932	2.09572	3.81878																0	0	0	0
																	6	2	0.8	5.84749	3.32767	7.34667	2.3648	3.53077		5.84749	3.32767	7.34667	2.3648	3.53077																0	0	0	0
																	6	2	0.95	6.64037	3.76573	8.22374	2.63372	3.24276		6.64037	3.76573	8.22374	2.63372	3.24276																0	0	0	0
																	6	2	1.1	7.43324	4.20382	9.10052	2.90246	2.95475		7.43324	4.20382	9.10052	2.90246	2.95475																0	0	0	0
																	6	4	0.05	1.81827	1.27461	3.04149	1.00164	4.97082		1.81827	1.27461	3.04149	1.00164	4.97082																0	0	0	0
																	6	4	0.2	2.60703	1.71182	3.92005	1.27152	4.68281		2.60703	1.71182	3.92005	1.27152	4.68281																0	0	0	0
																	6	4	0.35	3.39603	2.14914	4.79843	1.54127	4.3948		3.39603	2.14914	4.79843	1.54127	4.3948																0	0	0	0
																	6	4	0.5	4.18522	2.58656	5.6766	1.81087	4.10679		4.18522	2.58656	5.6766	1.81087	4.10679																0	0	0	0
																	6	4	0.65	4.97456	3.02405	6.55455	2.08032	3.81878		4.97456	3.02405	6.55455	2.08032	3.81878																0	0	0	0
																	6	4	0.8	5.764	3.46161	7.43224	2.3496	3.53077		5.764	3.46161	7.43224	2.3496	3.53077																0	0	0	0
																	6	4	0.95	6.5535	3.8992	8.30966	2.61872	3.24276		6.5535	3.8992	8.30966	2.61872	3.24276																0	0	0	0
																	6	4	1.1	7.34301	4.33683	9.18678	2.88766	2.95475		7.34301	4.33683	9.18678	2.88766	2.95475																0	0	0	0
																																														Mean Absolute Deviation	MAD=	0.148852	0.148852
																																														Means Square Error	MSE=	0.0501783	0.0501783
																																														Root Means Square Error	RMSE=	0.224005
																																														Mean Absolute Percentage Error	MAPE=	0.0672853
																																														Mean Percentage Error	MPE=	0.00633959
																																														Residuals Sum of Squares	RSS(SSE)=	7.22567
																																														Mean	Mean=	2.13687
																																														Standard Devision	SD=	0.336858
																																														Coefficient of Variations	C.V=	15.764
																																														Ratio of Performance to Deviation	RPD=	1.50379
																																														Mean Absolute Deviation	MAD=	0.111639	0.111639
																																														Means Square Error	MSE=	0.0376337	0.0376337
																																														Root Means Square Error	RMSE=	0.193994
																																														Mean Absolute Percentage Error	MAPE=	0.050464
																																														Mean Percentage Error	MPE=	0.00475469
																																														Residuals Sum of Squares	RSS(SSE)=	7.22567
																																														Mean	Mean=	2.75959
																																														Standard Devision	SD=	1.43921
																																														Coefficient of Variations	C.V=	52.1532
																																														Ratio of Performance to Deviation	RPD=	7.41886
[truncated: 21 more columns]

## Sheet: Soil Phosphorus
Replication	Fertilizers (A)	Vermicompost (B)	A × B	Soil Phosphorus		Fariman		Zahak		Replication	Fertilizers (A)	Vermicompost (B)	A × B	Soil Phosphorus			Fertilizers (A)	Vermicompost (B)	Soil Phosphorus	Seed Phosphorus	Fruit Phosphorus	Leaf Phosphorus	Root Phosphorus	Fruit Yield		Seed Phosphorus	Fruit Phosphorus	Leaf Phosphorus	Root Phosphorus	Fruit Yield																error (e)	abs(e)	e^2	abs(e)/Z
1	1	1	11	62.281			mg per kg			1	1	1	11	7.4			1	1	62.281	26.8782	28.0285	28.6708	22.475	6.699		26.93	27.98	28.72	22.53	5.14893																-0.0517852	0.0517852	0.00268171	0.00192296
1	1	2	12	37.8762						1	1	2	12	8.4			1	2	37.8762	30.6777	28.159	28.5287	27.985	4.074		30.63	28.21	28.58	27.94	4.28639																0.0476822	0.0476822	0.00227359	0.00155672
1	1	3	13	43.7333						1	1	3	13	9.1			1	3	43.7333	28.6318	27.5645	28.955	25.085	4.704		28.5799	27.61	29.01	25.0398	4.56917																0.0518382	0.0518382	0.0026872	0.0018138
1	1	4	14	37.4857						1	1	4	14	9.2			1	4	37.4857	28.0514	28.623	28.7521	26.68	4.032		28.1	28.57	28.8	26.73	4.33578																-0.0486495	0.0486495	0.00236678	0.0017313
1	2	1	21	24.2095						1	2	1	21	10.2			2	1	24.2095	33.2543	23.084	27.1193	30.015	2.604		33.2	23.13	27.17	29.97	3.90332																0.0542719	0.0542719	0.00294544	0.0016347
1	2	2	22	43.7333						1	2	2	22	9.3			2	2	43.7333	26.5365	22.446	27.3006	23.635	4.704		26.4898	22.5001	27.3502	23.5896	4.58529																0.0467075	0.0467075	0.00218159	0.00176323
1	2	3	23	44.9048						1	2	3	23	11.3			2	3	44.9048	21.0578	23.635	27.4681	13.05	4.83		21.1101	23.59	27.42	13.1001	4.79177																-0.0523072	0.0523072	0.00273604	0.00247783
1	2	4	24	47.6381						1	2	4	24	9.1			2	4	47.6381	26.6031	23.171	27.4123	22.765	5.124		26.65	23.12	27.46	22.82	4.72007																-0.0468925	0.0468925	0.0021989	0.00175957
1	3	1	31	28.1143						1	3	1	31	12.6			3	1	28.1143	21.4737	27.6225	29.3277	14.935	3.024		21.52	27.57	29.28	14.99	4.24767																-0.0463455	0.0463455	0.00214791	0.0021536
1	3	2	32	39.2429						1	3	2	32	12.2			3	2	39.2429	27.3676	28.4925	29.3045	25.085	4.221		27.42	28.44	29.25	25.14	4.6455																-0.0523897	0.0523897	0.00274468	0.00191064
1	3	3	33	24.2095						1	3	3	33	12.1			3	3	24.2095	27.2482	28.0865	29.3726	21.75	2.604		27.3	28.04	29.42	21.8	4.05647																-0.0517504	0.0517504	0.00267811	0.00189562
1	3	4	34	33.9714						1	3	4	34	9.8			3	4	33.9714	29.748	27.5703	29.3248	31.465	3.654		29.7	27.52	29.27	31.42	4.24833																0.0480179	0.0480179	0.00230572	0.00161676
1	4	1	41	43.7333						1	4	1	41	9.2			4	1	43.7333	27.8125	31.4215	29.1276	27.55	4.704		27.8603	31.37	29.0798	27.6006	4.57723																-0.047832	0.047832	0.0022879	0.00171685
1	4	2	42	44.9048						1	4	2	42	10.2			4	2	44.9048	27.9285	32.4945	29.5032	27.55	4.83		27.8799	32.44	29.45	27.4999	4.70311																0.0485525	0.0485525	0.00235734	0.00174148
1	4	3	43	47.6381						1	4	3	43	11.3			4	3	47.6381	27.4517	34.046	29.5423	21.895	5.124		27.5	34	29.59	21.95	4.8974																-0.0482742	0.0482742	0.0023304	0.00175542
1	4	4	44	43.7333						1	4	4	44	12.6			4	4	43.7333	33.3667	32.4365	29.3393	36.25	4.704		33.42	32.49	29.39	36.3	4.85129																-0.0532628	0.0532628	0.00283692	0.00159374
1	5	1	51	43.7333						1	5	1	51	12.2			5	1	43.7333	44.0055	23.8815	26.991	55.535	4.704		43.9594	23.93	27.0403	55.4888	4.81904																0.0461115	0.0461115	0.00212627	0.00104896
1	5	2	52	47.6381						1	5	2	52	12.1			5	2	47.6381	27.1625	23.2188	27.3064	24.65	5.124		27.21	23.27	27.3601	24.7	4.96189																-0.0475126	0.0475126	0.00225744	0.00174614
1	5	3	53	52.519						1	5	3	53	9.2			5	3	52.519	30.8983	23.722	27.4536	30.45	5.649		30.95	23.77	27.4	30.5	4.91676																-0.0517512	0.0517512	0.00267819	0.00167209
1	5	4	54	33.9714						1	5	4	54	10.2			5	4	33.9714	25.3182	23.2232	27.2629	23.2	3.654		25.37	23.17	27.31	23.2501	4.28058																-0.0517956	0.0517956	0.00268279	0.00204161
1	6	1	61	33.9714						1	6	1	61	9.3			6	1	33.9714	26.12	28.5505	28.6368	22.765	3.654		26.17	28.5	28.69	22.82	4.20803																-0.0500275	0.0500275	0.00250275	0.00191163
1	6	2	62	33.9714						1	6	2	62	11.3			6	2	33.9714	27.982	28.0865	28.7027	24.65	3.654		27.9299	28.14	28.65	24.5999	4.36924																0.0520684	0.0520684	0.00271112	0.00186425
1	6	3	63	37.8762						1	6	3	63	10.2			6	3	37.8762	24.4292	28.9565	28.6723	17.69	4.074		24.48	28.91	28.72	17.74	4.43148																-0.0507523	0.0507523	0.0025758	0.00207322
1	6	4	64	33.9714						1	6	4	64	11.3			6	4	33.9714	26.6638	27.376	28.9435	22.765	3.654		26.6099	27.43	28.89	22.7199	4.36924																0.0538115	0.0538115	0.00289568	0.00202223
2	1	1	11	43.5381						2	1	1	11	6.3			1	1	43.5381	26.1901	28.0285	28.6948	22.91	4.683		26.14	28.08	28.74	22.86	4.33593																0.0500903	0.0500903	0.00250904	0.00191623
2	1	2	12	43.7333						2	1	2	12	7.2			1	2	43.7333	28.5497	28.6375	28.7035	26.535	4.704		28.6001	28.5899	28.6499	26.5902	4.41602																-0.0503769	0.0503769	0.00253784	0.00176142
2	1	3	13	47.6381						2	1	3	13	10.1			1	3	47.6381	29.8935	27.6225	28.6571	27.55	5.124		29.84	27.57	28.6099	27.5	4.80068																0.0535238	0.0535238	0.0028648	0.0017937
2	1	4	14	33.3857						2	1	4	14	7.2			1	4	33.3857	30.6632	28.681	28.6593	27.985	3.591		30.71	28.73	28.71	28.04	4.01613																-0.0468214	0.0468214	0.00219224	0.00152463
2	2	1	21	28.1143						2	2	1	21	12.1			2	1	28.1143	30.2606	23.142	27.252	30.45	3.024		30.21	23.19	27.3	30.4	4.20737																0.0506344	0.0506344	0.00256384	0.00167608
2	2	2	22	53.4952						2	2	2	22	11.1			2	2	53.4952	27.5555	22.446	27.2658	24.65	5.754		27.6119	22.4	27.1019	24.7019	5.10764																-0.0563888	0.0563888	0.0031797	0.00204219
2	2	3	23	47.4429						2	2	3	23	13.1			2	3	47.4429	21.6319	23.5915	27.3963	14.065	5.103		21.68	23.64	27.4501	14.02	5.03495																-0.0480603	0.0480603	0.00230979	0.0022168
2	2	4	24	57.4						2	2	4	24	12.8			2	4	57.4	25.0455	23.171	27.2672	24.65	6.174		25.1	23.22	27.32	24.7	5.39557																-0.0545037	0.0545037	0.00297066	0.00217146
2	3	1	31	53.4952						2	3	1	31	10.3			3	1	53.4952	23.1492	27.6515	28.7158	15.515	5.754		23.1	27.7	28.77	15.47	5.04315																0.0492243	0.0492243	0.00242303	0.00213092
2	3	2	32	41.781						2	3	2	32	11.1			3	2	41.781	29.9943	28.5215	29.3552	23.49	4.494		29.94	28.57	29.41	23.44	4.65493																0.0542724	0.0542724	0.00294549	0.00181271
2	3	3	33	33.9714						2	3	3	33	10.2			3	3	33.9714	28.0425	28.072	29.857	26.1	3.654		27.9881	28.02	29.4319	26.0481	4.28058																0.0543817	0.0543817	0.00295737	0.00194303
2	3	4	34	63.2571						2	3	4	34	13.5			3	4	63.2571	29.9218	27.566	29.3132	27.55	6.804		29.87	27.52	29.36	27.5	5.67835																0.0517502	0.0517502	0.00267808	0.00173251
2	4	1	41	53.4952						2	4	1	41	7.2			4	1	53.4952	30.5675	31.4505	29.1407	27.55	5.754		30.5181	31.4	29.09	27.4981	4.79328																0.0493863	0.0493863	0.00243901	0.00161826
2	4	2	42	47.4429						2	4	2	42	12.1			4	2	47.4429	28.7622	32.4945	29.3509	27.55	5.103		28.71	32.44	29.2999	27.5	4.95434																0.0522632	0.0522632	0.00273144	0.00182038
2	4	3	43	57.4						2	4	3	43	13.1			4	3	57.4	28.1765	34.075	29.3291	21.75	6.174		28.23	34.03	29.28	21.8	5.41975																-0.0535011	0.0535011	0.00286237	0.00189519
2	4	4	44	47.6381						2	4	4	44	10.3			4	4	47.6381	34.4123	28.072	29.4857	33.35	5.124		34.36	28.02	29.4399	33.2999	4.8168																0.0522934	0.0522934	0.0027346	0.00152193
2	5	1	51	53.4952						2	5	1	51	11.1			5	1	53.4952	46.7967	23.867	27.3021	56.55	5.754		44.5519	23.92	27.26	53.7019	5.10764																2.24486	2.24486	5.03941	0.0503876
2	5	2	52	57.4						2	5	2	52	10.2			5	2	57.4	25.357	23.2145	27.5261	24.65	6.174		25.41	23.26	27.58	24.6	5.186																-0.0530016	0.0530016	0.00280917	0.00208585
2	5	3	53	33.7762						2	5	3	53	7.2			5	3	33.7762	30.092	23.693	27.2883	33.35	3.633		30.04	23.74	27.34	33.2999	4.03122																0.0520372	0.0520372	0.00270787	0.00173226
2	5	4	54	37.8762						2	5	4	54	12.1			5	4	37.8762	26.6493	23.171	27.2803	22.765	4.074		26.6	23.22	27.33	22.72	4.58463																0.0492514	0.0492514	0.0024257	0.00185156
2	6	1	61	43.7333						2	6	1	61	11.1			6	1	43.7333	25.3192	28.5505	28.6578	23.635	4.704		26.6684	28.5	28.5418	23.5887	4.73038																-1.34916	1.34916	1.82024	0.0505902
2	6	2	62	43.7333						2	6	2	62	13.1			6	2	43.7333	26.0887	28.072	28.7818	21.75	4.704		26.1416	28.05	28.78	20.3514	4.89159																-0.0528872	0.0528872	0.00279706	0.0020231
2	6	3	63	47.6381						2	6	3	63	12.1			6	3	47.6381	24.2152	28.9565	28.9043	15.95	5.124		24.17	28.91	28.8499	15.9	4.96189																0.0452634	0.0452634	0.00204877	0.00187271
2	6	4	64	43.7333						2	6	4	64	13.1			6	4	43.7333	25.3257	27.3905	28.6788	20.735	4.704		26.2681	27.41	28.67	22.4281	4.89159																-0.942371	0.942371	0.888063	0.0358751
3	1	1	11	44.5143						3	1	1	11	6.3			1	1	44.5143	26.4847	28.0575	28.4838	22.765	4.788		26.43	28.11	28.53	22.72	4.37366																0.0547106	0.0547106	0.00299325	0.00207002
3	1	2	12	47.6381						3	1	2	12	6			1	2	47.6381	29.3392	28.594	28.6259	28.565	5.124		29.39	28.54	28.68	28.62	4.4702																-0.0508424	0.0508424	0.00258495	0.00172992
3	1	3	13	57.4						3	1	3	13	6			1	3	57.4	28.4293	27.5935	28.8289	25.665	6.174		28.38	27.54	28.78	25.62	4.84746																0.0493499	0.0493499	0.00243541	0.0017389
3	1	4	14	42.3667						3	1	4	14	7.1			1	4	42.3667	28.8027	28.6375	28.7231	26.535	4.557		28.75	28.59	28.77	26.4899	4.35514																0.0527591	0.0527591	0.00278352	0.0018351
3	2	1	21	26.1619						3	2	1	21	13.1			2	1	26.1619	30.9228	23.1275	26.9888	30.45	2.814		30.97	23.08	26.94	30.5	4.21252																-0.0472038	0.0472038	0.0022282	0.00152418
3	2	2	22	53.4952						3	2	2	22	12.8			2	2	53.4952	28.1556	22.4025	27.0526	26.1	5.754		27.6119	22.4	27.1019	24.7019	5.24467																0.543685	0.543685	0.295593	0.0196902
3	2	3	23	42.9524						3	2	3	23	10.1			2	3	42.9524	21.3168	23.6205	27.3122	13.34	4.62		21.3702	23.57	27.2599	13.3903	4.61959																-0.0533948	0.0533948	0.002851	0.00249857
3	2	4	24	43.7333						3	2	4	24	13.2			2	4	43.7333	26.9923	23.1565	27.2912	21.75	4.704		26.94	23.1716	27.3241	21.7	4.89965																0.0523359	0.0523359	0.00273905	0.00194269
3	3	1	31	57.4						3	3	1	31	9.3			3	1	57.4	23.1571	27.666	29.1059	15.95	6.174		23.11	27.72	29.16	15.9	5.11345																0.0470801	0.0470801	0.00221653	0.00203722
3	3	2	32	37.8762						3	3	2	32	12.3			3	2	37.8762	27.5147	28.478	29.3219	25.665	4.074		27.46	28.53	29.37	25.62	4.60075																0.0546695	0.0546695	0.00298875	0.00199088
3	3	3	33	33.9714						3	3	3	33	13.1			3	3	33.9714	26.5935	28.072	29.3813	22.765	3.654		27.9881	28.02	29.4319	26.0481	4.51433																-1.39466	1.39466	1.94509	0.0498306
3	3	4	34	53.4952						3	3	4	34	10.2			3	4	53.4952	29.7598	27.5761	29.1261	27.55	5.754		29.71	27.63	29.18	27.5	5.03509																0.0498337	0.0498337	0.0024834	0.00167734
3	4	1	41	53.4952						3	4	1	41	7.1			4	1	53.4952	28.7565	31.4505	29.1363	24.65	5.754		30.5181	31.4	29.09	27.4981	4.78522																-1.76161	1.76161	3.10328	0.0577235
3	4	2	42	42.9524						3	4	2	42	13.1			4	2	42.9524	29.5323	32.5235	29.3357	26.1	4.62		29.4799	32.47	29.2899	26.0499	4.86141																0.0523948	0.0523948	0.00274521	0.0017773
3	4	3	43	43.7333						3	4	3	43	10.1			4	3	43.7333	27.0592	34.046	29.1218	27.55	4.704		27.0098	34	29.17	27.4997	4.64977																0.0494007	0.0494007	0.00244043	0.00182899
3	4	4	44	57.4						3	4	4	44	9.3			4	4	57.4	33.0734	32.4655	29.0362	33.35	6.174		33.02	32.52	29.09	33.3	5.11345																0.0534206	0.0534206	0.00285376	0.00161782
3	5	1	51	53.4952						3	5	1	51	12.3			5	1	53.4952	44.4956	23.9105	27.2107	53.65	5.754		44.5519	23.92	27.26	53.7019	5.20436																-0.0563044	0.0563044	0.00317018	0.00126379
3	5	2	52	43.7333						3	5	2	52	13.1			5	2	43.7333	27.2845	23.1565	27.3267	21.75	4.704		27.3305	23.2101	27.38	21.801	4.89159																-0.0459751	0.0459751	0.00211371	0.00168219
3	5	3	53	34.7524						3	5	3	53	7.1			5	3	34.7524	31.326	23.751	27.2745	30.45	3.738		31.28	23.8	27.22	30.4	4.06088																0.0460109	0.0460109	0.00211701	0.00147094
3	5	4	54	47.6381						3	5	4	54	13.1			5	4	47.6381	26.8135	23.2275	27.6058	21.75	5.124		26.86	23.28	27.6601	21.8	5.04249																-0.0465283	0.0465283	0.00216489	0.00173225
3	6	1	61	43.7333						3	6	1	61	12.8			6	1	43.7333	26.7221	28.4925	28.4903	20.735	4.704		26.6684	28.5	28.5418	23.5887	4.86741																0.0536721	0.0536721	0.00288069	0.00201257
3	6	2	62	43.7333						3	6	2	62	10.1			6	2	43.7333	26.2673	28.101	28.7303	20.3	4.704		26.1416	28.05	28.78	20.3514	4.64977																0.125613	0.125613	0.0157786	0.00480509
3	6	3	63	33.9714						3	6	3	63	13.1			6	3	33.9714	23.7673	29.0145	28.7492	17.835	3.654		23.8201	28.96	28.7042	17.8902	4.51433																-0.0527706	0.0527706	0.00278473	0.00221538
3	6	4	64	43.7333						3	6	4	64	10.1			6	4	43.7333	26.32	27.3615	28.7201	22.475	4.704		26.2681	27.41	28.67	22.4281	4.64977																0.0518438	0.0518438	0.00268778	0.00197364
																	1	1	7.4	20.34	22.9909	16.73	21.71	2.6817		20.29	22.94	16.7804	21.66	2.46867																0.0500251	0.0500251	0.00250251	0.00246551
																	1	2	8.4	19.49	24.2723	18.15	22.92	2.1189		19.5402	24.3202	18.0997	22.9702	2.05512																-0.0501556	0.0501556	0.00251559	0.0025668
																	1	3	9.1	23.705	25.4795	17.64	24.06	2.5977		23.6598	25.43	17.59	24.01	2.1907																0.0451593	0.0451593	0.00203936	0.00190869
																	1	4	9.2	18.565	21.2753	14.6	20.09	1.8669		18.52	21.23	14.5498	20.04	2.0788																0.0450202	0.0450202	0.00202682	0.0024309
																	2	1	10.2	19.98	21.9637	21.37	20.74	2.1525		19.9299	21.9099	21.3525	20.6899	1.87145																0.0500674	0.0500674	0.00250674	0.00251217
																	2	2	9.3	19.61	22.6308	21.01	21.37	2.1777		19.56	22.5797	20.959	21.3197	2.19843																0.0500317	0.0500317	0.00250317	0.00255786
																	2	3	11.3	15.2337	11.0983	20.83	10.48	2.2365		15.1799	11.0498	18.5787	10.4298	2.29742																0.0538022	0.0538022	0.00289468	0.00354431
																	2	4	9.1	15.78	11.416	18.21	10.78	2.373		15.73	11.4704	18.1598	10.8303	2.26305																0.0500261	0.0500261	0.00250261	0.0031803
																	3	1	12.6	16.3465	12.4962	15.88	11.8	2.4507		16.3	12.5501	15.8297	11.8501	2.03655																0.0465434	0.0465434	0.00216628	0.00285542
																	3	2	12.2	17.007	15.9062	16.45	15.02	1.9551		16.6108	15.8585	18.8765	14.9685	2.2273																0.396246	0.396246	0.157011	0.0238547
																	3	3	12.1	19.66	17.823	19.76	16.83	1.638		19.7105	17.7698	18.305	16.7798	1.94488																-0.0504914	0.0504914	0.00254938	0.00256165
																	3	4	9.8	20.255	19.8351	16.12	18.73	2.5326		20.2098	19.7887	19.4225	18.6788	2.03687																0.0451969	0.0451969	0.00204276	0.00223638
																	4	1	9.2	19.995	19.6974	19.773	18.6	2.1777		20.0501	19.6499	19.7198	18.5499	2.19456																-0.0551067	0.0551067	0.00303675	0.00274845
																	4	2	10.2	21.021	19.6974	19.675	18.6	2.2365		20.9694	19.7501	19.6284	18.6501	2.25491																0.0516113	0.0516113	0.00266372	0.00246126
																	4	3	11.3	18.37	15.5673	19.969	14.7	2.373		18.3193	15.52	19.9195	14.65	2.34807																0.0507342	0.0507342	0.00257396	0.00276945
																	4	4	12.6	22.015	26.0514	19.829	24.6	2.1777		22.0701	25.9999	20.6417	24.5499	2.32596																-0.0551295	0.0551295	0.00303927	0.00249793
																	5	1	12.2	32.6681	40.1361	18.703	37.9	2.1777		31.1908	40.0054	18.6488	37.789	2.3105																1.47724	1.47724	2.18224	0.0473614
																	5	2	12.1	17.875	17.5794	18.828	16.6	2.4066		17.9309	17.6304	18.8802	16.6504	2.37899																-0.0558523	0.0558523	0.00311948	0.00311487
																	5	3	9.2	21.67	21.8154	18.9435	20.6	2.1945		21.6194	21.77	18.8894	20.55	2.35735																0.0505523	0.0505523	0.00255554	0.00233828
																	5	4	10.2	18.5418	16.5204	18.905	15.6	1.6926		18.59	16.4698	18.8814	15.5498	2.05233																-0.0482055	0.0482055	0.00232377	0.00259308
																	6	1	9.3	18.6014	16.2027	20.226	15.3	1.7325		18.55	16.15	20.2801	15.25	2.01755																0.0514425	0.0514425	0.00264633	0.00277318
																	6	2	11.3	18.32	17.5794	20.21	16.6	1.6926		18.2698	17.5296	20.2285	16.5497	2.09484																0.0502414	0.0502414	0.0025242	0.00274998
																	6	3	10.2	15.485	12.4962	20.257	11.8	1.8858		15.5401	12.5502	20.3103	11.8502	2.12468																-0.0551225	0.0551225	0.00303849	0.00354711
																	6	4	11.3	18.7364	16.2027	20.224	15.3	1.6926		18.69	16.2501	20.2704	15.3501	2.09484																0.0464488	0.0464488	0.00215749	0.00248523
																	1	1	6.3	21.22	20.7776	20.26	19.62	2.3772		21.2719	20.8319	20.3115	19.6719	2.07887																-0.0518956	0.0518956	0.00269315	0.00243963
																	1	2	7.2	20.145	21.593	15.96	20.39	2.1777		20.0999	21.54	16.0101	20.34	2.11727																0.0450747	0.0450747	0.00203173	0.00224253
																	1	3	10.1	22.75	23.0438	19.97	21.76	2.373		22.7	22.9899	20.0204	21.7099	2.30169																0.0500045	0.0500045	0.00250045	0.00220284
																	1	4	7.2	18.587	18.8926	19.46	17.84	2.0832		18.64	16.49	19.4083	15.6342	1.92554																-0.0530726	0.0530726	0.0028167	0.00284723
																	2	1	12.1	19.8277	19.8351	23.5	18.73	2.0223		19.8801	19.79	23.4496	18.68	2.01723																-0.0524044	0.0524044	0.00274622	0.00263602
																	2	2	11.1	19.6787	20.9894	23.83	19.82	2.6649		19.6297	21.0403	23.8803	19.8703	2.44887																0.0490609	0.0490609	0.00240697	0.00249932
																	2	3	13.1	15.2089	10.4841	16.35	9.9	2.3625		15.2603	10.5304	16.4008	9.95038	2.41402																-0.0514623	0.0514623	0.00264837	0.00337229
																	2	4	12.8	15.395	12.761	14.68	12.05	2.4381		15.3499	12.8102	14.7309	12.1002	2.58692																0.045141	0.045141	0.00203771	0.00294081
																	3	1	10.3	17.4403	13.8094	17.33	13.04	2.2449		17.3899	13.8601	17.2797	13.0901	2.41795																0.050315	0.050315	0.0025316	0.00289334
																	3	2	11.1	16.79	16.4039	18.9	15.49	2.0811		16.8411	16.3497	19.7893	15.4397	2.23181																-0.0510684	0.0510684	0.00260798	0.00303237
																	3	3	10.2	20.285	18.0242	19.85	17.02	1.9257		20.2387	18.0702	19.7991	17.0702	2.05233																0.0463429	0.0463429	0.00214767	0.00228982
																	3	4	13.5	20.762	18.8926	34.39	17.84	2.52		20.8101	18.9401	32.8545	17.8901	2.72249																-0.0480925	0.0480925	0.00231289	0.00231102
																	4	1	7.2	19.355	19.6974	19.7895	18.6	2.6649		19.3098	19.6497	19.84	18.5498	2.29815																0.0451872	0.0451872	0.00204188	0.00234011
																	4	2	12.1	19.761	19.6974	19.7955	18.6	2.3625		19.7095	19.75	19.0274	18.65	2.37537																0.0515639	0.0515639	0.00265884	0.0026162
																	4	3	13.1	19.63	15.4614	19.7635	14.6	2.8581		19.6802	15.5102	19.8104	14.6501	2.59851																-0.0502032	0.0502032	0.00252036	0.00255095
																	4	4	10.3	23.715	23.9334	19.765	22.6	2.373		23.6696	23.9803	19.8209	22.6503	2.30942																0.0453686	0.0453686	0.00205831	0.00191674
																	5	1	11.1	30.325	40.8774	18.7945	38.6	2.6649		30.3801	40.8299	18.7394	38.5499	2.44887																-0.0551096	0.0551096	0.00303707	0.001814
																	5	2	10.2	18.535	17.5794	18.804	16.6	2.8581		18.59	17.6302	19.0866	16.6501	2.48644																-0.0550163	0.0550163	0.00302679	0.00295945
																	5	3	7.2	21.28	23.9334	18.894	22.6	2.0391		21.3314	23.8798	18.9414	22.5498	1.93277																-0.0514291	0.0514291	0.00264495	0.00241095
																	5	4	12.1	17.2764	16.2027	18.805	15.3	1.8858		17.3301	16.15	17.7251	15.25	2.19811																-0.0537163	0.0537163	0.00288544	0.00309959
																	6	1	11.1	18.985	16.8381	19.804	15.9	2.1777		19.0401	16.8903	19.8502	15.9503	2.26799																-0.0550599	0.0550599	0.00303159	0.00289179
																	6	2	13.1	19.0054	15.4614	20.245	14.6	2.1777		18.9599	15.4099	20.3003	14.5499	2.34528																0.0455352	0.0455352	0.00207345	0.00240166
																	6	3	12.1	18.21	11.2254	20.591	10.6	2.373		18.1598	11.28	20.6403	10.65	2.37899																0.0501929	0.0501929	0.00251933	0.00276396
																	6	4	13.1	16.3745	14.7201	20.216	13.9	2.1777		16.42	14.77	20.27	13.95	2.34528																-0.0455599	0.0455599	0.0020757	0.00277465
																	1	1	6.3	21.76	20.9576	22.81	19.79	2.4276		21.2719	20.8319	20.3115	19.6719	2.09696																0.488104	0.488104	0.238246	0.022946
																	1	2	6	20.2304	23.3933	19.76	22.09	2.373		20.2801	23.4401	19.8105	22.1401	2.14324																-0.0496378	0.0496378	0.00246391	0.00244762
																	1	3	6	22.8329	24.1664	21.87	22.82	2.4381		22.78	24.1198	21.8195	22.7698	2.32412																0.0529935	0.0529935	0.00280831	0.00232632
																	1	4	7.1	18	14.593	18.83	13.78	1.6905		18.0091	14.6419	19.7535	13.8319	2.08808																-0.00911225	0.00911225	8.3033e-05	0.00050598
																	2	1	13.1	19.03	16.8593	19.19	15.92	1.9866		18.98	16.91	19.2407	15.97	2.0197																0.0500206	0.0500206	0.00250206	0.00263544
																	2	2	12.8	19.925	18.9667	23.01	17.91	2.6649		19.8798	18.9196	20.8443	17.8596	2.51457																0.0451692	0.0451692	0.00204026	0.00227211
																	2	3	10.1	15.3596	10.2935	18.95	9.72	2.1399		15.4106	10.3403	19.1932	9.77028	2.21487																-0.0510269	0.0510269	0.00260375	0.00331115
																	2	4	13.2	15.2246	12.1467	19.17	11.47	2.5977		15.2242	12.0996	19.1199	11.4197	2.34915																0.000391626	0.000391626	1.53371e-07	2.5724e-05
																	3	1	9.3	16.3723	12.7186	19.28	12.01	2.2281		16.42	12.7702	19.3305	12.0602	2.45166																-0.047723	0.047723	0.00227748	0.00290639
																	3	2	12.3	16.54	14.4765	18.7	13.67	2.4066		16.5917	15.6357	18.751	14.757	2.20584																-0.05171	0.05171	0.00267393	0.00311662
																	3	3	13.1	18.91	15.6732	18.08	14.8	2.0223		18.8594	15.6198	19.9296	14.7498	2.1644																0.0505579	0.0505579	0.0025561	0.00268077
																	3	4	10.2	19.225	17.7277	23.35	16.74	2.6649		19.2805	17.7807	19.3405	16.7907	2.41409																-0.0554597	0.0554597	0.00307577	0.00287647
																	4	1	7.1	20.0133	17.5794	19.644	16.6	2.6649		20.0602	17.6303	19.6027	16.6502	2.29428																-0.046832	0.046832	0.00219324	0.00233458
																	4	2	13.1	19.6713	18.6384	19.742	17.6	2.4066		19.7203	18.5897	19.1971	17.5497	2.33081																-0.0490208	0.0490208	0.00240304	0.0024858
																	4	3	10.1	19.3517	19.6974	19.882	18.6	2.1777		19.4017	19.6498	19.9311	18.5498	2.22934																-0.0499885	0.0499885	0.00249885	0.00257651
																	4	4	9.3	22.9833	23.9334	19.809	22.6	2.8581		23.03	23.9803	19.7593	22.6503	2.45166																-0.0466997	0.0466997	0.00218086	0.00202777
																	5	1	12.3	30.6767	38.7594	18.613	36.6	2.6649		30.7317	38.8117	18.6716	36.6517	2.49524																-0.0549854	0.0549854	0.0030234	0.00178921
																	5	2	13.1	19.1383	15.4614	18.657	14.6	2.1777		19.0895	15.51	18.711	14.65	2.34528																0.0487868	0.0487868	0.00238015	0.00255568
																	5	3	7.1	21.7383	21.8154	18.836	20.6	1.9425		21.6887	21.8702	18.7888	20.6502	1.947																0.0496364	0.0496364	0.00246378	0.00228859
																	5	4	13.1	17.9538	15.4614	18.8215	14.6	2.373		17.8998	15.41	18.8707	14.55	2.41763																0.0539747	0.0539747	0.00291327	0.00301538
																	6	1	12.8	17.98	14.7201	20.073	13.9	2.4066		18.0301	14.77	20.0195	13.95	2.33369																-0.0500911	0.0500911	0.00250912	0.00277819
																	6	2	10.1	18.5317	14.4024	20.222	13.6	2.1777		18.5801	14.3499	20.1691	13.5499	2.22934																-0.0484359	0.0484359	0.00234603	0.00260687
																	6	3	13.1	16.2483	12.6021	20.263	11.9	2.1189		16.3002	12.55	20.2093	11.85	2.1644																-0.0518841	0.0518841	0.00269196	0.00318303
																	6	4	10.1	18.0861	15.9909	20.087	15.1	2.4066		18.14	15.94	20.0399	15.05	2.22934																-0.0538889	0.0538889	0.00290401	0.00297072
															10		2	2	10	19.5737	19.4577	19.5033	18.58	2.16355		19.5737	19.4577	19.5033	18.58	2.16355																0	0	0	0
															17		2	2	17	21.4591	19.6326	21.8267	19.3865	2.7046		21.4591	19.6326	21.8267	19.3865	2.7046																0	0	0	0
															24		2	2	24	25.0618	22.6098	25.2394	22.7531	3.24564	K_VC=2,2	25.0618	22.6098	25.2394	22.7531	3.24564																0	0	0	0
															31		2	2	31	27.9354	25.9942	28.0188	25.7557	3.78669	K_VC=2,4	27.9354	25.9942	28.0188	25.7557	3.78669																0	0	0	0
															38		2	2	38	28.9651	28.1556	29.2341	26.7984	4.32773	K_VC=4,2	28.9651	28.1556	29.2341	26.7984	4.32773																0	0	0	0
															45		2	2	45	28.4147	28.5403	28.9064	25.8593	4.86878	K_VC=4,4	28.4147	28.5403	28.9064	25.8593	4.86878																0	0	0	0
															52		2	2	52	27.4734	27.7296	27.951	24.2029	5.40982	K_VC=6,2	27.4734	27.7296	27.951	24.2029	5.40982																0	0	0	0
															59		2	2	59	27.5255	27.2435	27.9226	23.7099	5.95087	K_VC=6,4	27.5255	27.2435	27.9226	23.7099	5.95087																0	0	0	0
																	2	4	10	18.8023	18.7283	19.0384	18.2382	2.16355		18.8023	18.7283	19.0384	18.2382	2.16355																0	0	0	0
																	2	4	17	20.585	19.011	21.3463	18.5218	2.7046		20.585	19.011	21.3463	18.5218	2.7046																0	0	0	0
																	2	4	24	24.1791	22.1047	24.7667	21.5953	3.24564		24.1791	22.1047	24.7667	21.5953	3.24564																0	0	0	0
																	2	4	31	27.1535	25.605	27.5847	24.5825	3.78669		27.1535	25.605	27.5847	24.5825	3.78669																0	0	0	0
																	2	4	38	28.3944	27.8725	28.875	25.9014	4.32773		28.3944	27.8725	28.875	25.9014	4.32773																0	0	0	0
																	2	4	45	28.1513	28.3453	28.6599	25.5066	4.86878		28.1513	28.3453	28.6599	25.5066	4.86878																0	0	0	0
																	2	4	52	27.5858	27.5991	27.8516	24.606	5.40982		27.5858	27.5991	27.8516	24.606	5.40982																0	0	0	0
																	2	4	59	28.0456	27.1506	27.9975	24.9983	5.95087		28.0456	27.1506	27.9975	24.9983	5.95087																0	0	0	0
																	4	2	10	19.3431	18.0368	19.4731	17.0876	2.16355		19.3431	18.0368	19.4731	17.0876	2.16355																0	0	0	0
																	4	2	17	20.7739	18.6274	21.7783	17.3652	2.7046		20.7739	18.6274	21.7783	17.3652	2.7046																0	0	0	0
																	4	2	24	24.0393	21.9757	25.1664	20.4658	3.24564		24.0393	21.9757	25.1664	20.4658	3.24564																0	0	0	0
																	4	2	31	26.7758	25.6514	27.9209	23.5313	3.78669		26.7758	25.6514	27.9209	23.5313	3.78669																0	0	0	0
																	4	2	38	27.9285	27.9969	29.1176	24.993	4.32773		27.9285	27.9969	29.1176	24.993	4.32773																0	0	0	0
																	4	2	45	27.7852	28.4426	28.7835	24.8099	4.86878		27.7852	28.4426	28.7835	24.8099	4.86878																0	0	0	0
																	4	2	52	27.5154	27.5673	27.8387	24.1827	5.40982		27.5154	27.5673	27.8387	24.1827	5.40982																0	0	0	0
																	4	2	59	28.4417	26.9017	27.8403	24.8913	5.95087		28.4417	26.9017	27.8403	24.8913	5.95087																0	0	0	0
																	4	4	10	18.7395	17.2613	19.1897	16.7293	2.16355		18.7395	17.2613	19.1897	16.7293	2.16355																0	0	0	0
																	4	4	17	20.0304	17.9511	21.4783	16.4531	2.7046		20.0304	17.9511	21.4783	16.4531	2.7046																0	0	0	0
																	4	4	24	23.244	21.4085	24.8698	19.2276	3.24564		23.244	21.4085	24.8698	19.2276	3.24564																0	0	0	0
																	4	4	31	26.0352	25.194	27.6559	22.2447	3.78669		26.0352	25.194	27.6559	22.2447	3.78669																0	0	0	0
																	4	4	38	27.3534	27.6413	28.918	23.9517	4.32773		27.3534	27.6413	28.918	23.9517	4.32773																0	0	0	0
																	4	4	45	27.4754	28.1728	28.685	24.2866	4.86878		27.4754	28.1728	28.685	24.2866	4.86878																0	0	0	0
																	4	4	52	27.5458	27.3618	27.8743	24.395	5.40982		27.5458	27.3618	27.8743	24.395	5.40982																0	0	0	0
																	4	4	59	28.8523	26.7356	28.0363	25.9763	5.95087		28.8523	26.7356	28.0363	25.9763	5.95087																0	0	0	0
																	6	2	10	18.5947	16.5605	19.5498	15.4738	2.16355		18.5947	16.5605	19.5498	15.4738	2.16355																0	0	0	0
																	6	2	17	19.5365	17.5447	21.7985	15.1592	2.7046		19.5365	17.5447	21.7985	15.1592	2.7046																0	0	0	0
																	6	2	24	22.438	21.2414	25.1218	17.9268	3.24564		22.438	21.2414	25.1218	17.9268	3.24564																0	0	0	0
																	6	2	31	25.0247	25.1893	27.8135	20.9949	3.78669		25.0247	25.1893	27.8135	20.9949	3.78669																0	0	0	0
																	6	2	38	26.3047	27.7068	28.9589	22.8289	4.32773		26.3047	27.7068	28.9589	22.8289	4.32773																0	0	0	0
																	6	2	45	26.5883	28.2094	28.5929	23.3722	4.86878		26.5883	28.2094	28.5929	23.3722	4.86878																0	0	0	0
																	6	2	52	27.0215	27.2729	27.6398	23.7611	5.40982		27.0215	27.2729	27.6398	23.7611	5.40982																0	0	0	0
																	6	2	59	28.8603	26.4366	27.6581	25.6717	5.95087		28.8603	26.4366	27.6581	25.6717	5.95087																0	0	0	0
																	6	4	10	18.1587	15.7405	19.4484	15.0999	2.16355		18.1587	15.7405	19.4484	15.0999	2.16355																0	0	0	0
																	6	4	17	18.924	16.8152	21.6794	14.2018	2.7046		18.924	16.8152	21.6794	14.2018	2.7046																0	0	0	0
																	6	4	24	21.7308	20.6132	25.0018	16.6111	3.24564		21.7308	20.6132	25.0018	16.6111	3.24564																0	0	0	0
																	6	4	31	24.3261	24.6647	27.718	19.5978	3.78669		24.3261	24.6647	27.718	19.5978	3.78669																0	0	0	0
																	6	4	38	25.7258	27.2795	28.9193	21.646	4.32773		25.7258	27.2795	28.9193	21.646	4.32773																0	0	0	0
																	6	4	45	26.2323	27.8656	28.6426	22.68	4.86878		26.2323	27.8656	28.6426	22.68	4.86878																0	0	0	0
																	6	4	52	26.9694	26.9931	27.8105	23.7828	5.40982		26.9694	26.9931	27.8105	23.7828	5.40982																0	0	0	0
																	6	4	59	29.1603	26.1979	27.975	26.5516	5.95087		29.1603	26.1979	27.975	26.5516	5.95087																0	0	0	0
																																														Mean Absolute Deviation	MAD=	0.120814	0.120814
																																														Means Square Error	MSE=	0.111269	0.111269
																																														Root Means Square Error	RMSE=	0.333569
																																														Mean Absolute Percentage Error	MAPE=	0.00457718
																																														Mean Percentage Error	MPE=	-0.000192751
																																														Residuals Sum of Squares	RSS(SSE)=	16.0227
																																														Mean	Mean=	23.9158
																																														Standard Devision	SD=	5.82251
																																														Coefficient of Variations	C.V=	24.3459
																																														Ratio of Performance to Deviation	RPD=	17.4552
																																														Mean Absolute Deviation	MAD=	0.0906106	0.0906106
																																														Means Square Error	MSE=	0.0834514	0.0834514
																																														Root Means Square Error	RMSE=	0.28888
																																														Mean Absolute Percentage Error	MAPE=	0.00343289
																																														Mean Percentage Error	MPE=	-0.000144564
																																														Residuals Sum of Squares	RSS(SSE)=	16.0227
																																														Mean	Mean=	24.1701
																																														Standard Devision	SD=	5.35851
																																														Coefficient of Variations	C.V=	22.17
																																														Ratio of Performance to Deviation	RPD=	18.5493
[truncated: 21 more columns]

## Sheet: Soil Potassium
Replication	Fertilizers (A)	Vermicompost (B)	A × B	Soil Potassium		Fariman		Zahak		Replication	Fertilizers (A)	Vermicompost (B)	A × B	Soil Potassium			Fertilizers (A)	Vermicompost (B)	Soil Potassium	Seed Potassium	Fruit Potassium	Leaf Potassium	Root Potassium	Fruit Yield		Seed Potassium	Fruit Potassium	Leaf Potassium	Root Potassium	Fruit Yield																error (e)	abs(e)	e^2	abs(e)/Z
1	1	1	11	300			mg per kg			1	1	1	11	195.194			1	1	300	13.344	17.8727	10.86	14.16	6.699		13.54	17.67	10.81	14.11	5.57799																-0.196	0.196	0.038416	0.0144756
1	1	2	12	250						1	1	2	12	188.01			1	2	250	12.396	16.2621	9.72	14.88	4.074		12.6	16.46	9.77	14.83	4.98836																-0.204	0.204	0.0416161	0.0161905
1	1	3	13	300						1	1	3	13	198.883			1	3	300	13.944	18.3911	11.04	16.56	4.704		14.1419	18.5919	11.0919	13.4119	5.64781																-0.1979	0.1979	0.0391644	0.0139939
1	1	4	14	230						1	1	4	14	192.913			1	4	230	17.4	20.9181	11.58	12.012	4.032		17.2	20.72	11.53	12.06	4.89968																0.2	0.2	0.0400002	0.0116279
1	2	1	21	190						1	2	1	21	197.379			2	1	190	19.5	18.099	7.2	16.296	2.604		16.1019	17.8981	7.51812	11.7319	4.62127																3.3981	3.3981	11.5471	0.211037
1	2	2	22	180						1	2	2	22	198.398			2	2	180	16.8	21.6981	12.804	7.404	4.704		17.0019	21.9019	12.8519	7.7481	4.54982																-0.2019	0.2019	0.0407635	0.0118751
1	2	3	23	210						1	2	3	23	205.68			2	3	210	18	19.7828	9.972	15.792	4.83		16.37	17.9597	9.18867	12.1318	4.95982																1.63001	1.63001	2.65692	0.0995729
1	2	4	24	170						1	2	4	24	207.476			2	4	170	19.2	20.1427	9.6	8.1	5.124		17.7219	18.8019	9.0519	8.0481	4.63088																1.4781	1.4781	2.18478	0.0834053
1	3	1	31	320						1	3	1	31	210.583			3	1	320	22.56	19.6166	6.9	11.4	3.024		18.8019	18.3319	7.7481	11.543	6.05067																3.7581	3.7581	14.1233	0.199879
1	3	2	32	300						1	3	2	32	201.068			3	2	300	13.92	16.346	8.844	11.82	4.221		14.1051	16.55	8.89	11.87	5.68915																-0.185097	0.185097	0.0342609	0.0131227
1	3	3	33	250						1	3	3	33	212.864			3	3	250	16.2	19.5259	10.836	11.784	2.604		15.8019	18.5619	10.0119	11.8319	5.45871																0.398101	0.398101	0.158484	0.0251932
1	3	4	34	190						1	3	4	34	206.65			3	4	190	19.44	21.8373	11.28	18.78	3.654		19.24	21.64	11.23	18.73	4.79673																0.200001	0.200001	0.0400003	0.010395
1	4	1	41	260						1	4	1	41	206.068			4	1	260	15.444	15.3199	6.768	19.02	4.704		15.6325	15.52	6.82	18.89	5.42084																-0.188496	0.188496	0.0355307	0.012058
1	4	2	42	270						1	4	2	42	204.854			4	2	270	16.776	18.7207	9.6	14.76	4.83		16.98	18.92	9.65	14.81	5.4886																-0.204	0.204	0.0416161	0.0120141
1	4	3	43	200						1	4	3	43	185.243			4	3	200	15.6	21.2161	13.044	16.536	5.124		15.999	21.0199	12.53	15.6899	4.48233																-0.399049	0.399049	0.15924	0.024942
1	4	4	44	240.8						1	4	4	44	208.883			4	4	240.8	13.62	17.6905	10.488	11.352	4.704		13.42	17.49	10.44	11.4	5.29991																0.2	0.2	0.0400002	0.0149032
1	5	1	51	211.2						1	5	1	51	211.019			5	1	211.2	11.772	14.3977	8.1	8.76	4.704		11.97	14.2	8.04943	8.81012	5.07176																-0.198017	0.198017	0.0392107	0.0165427
1	5	2	52	229.2						1	5	2	52	217.767			5	2	229.2	14.796	15.3172	7.176	12.564	5.124		14.6	15.3416	7.23	12.51	5.36277																0.196	0.196	0.038416	0.0134247
1	5	3	53	255.2						1	5	3	53	210.534			5	3	255.2	15.48	17.583	9.192	8.928	5.649		15.68	17.78	9.24	8.98	5.4618																-0.2	0.2	0.0400002	0.0127551
1	5	4	54	234.7						1	5	4	54	207.136			5	4	234.7	11.688	16.4128	10.332	16.224	3.654		11.89	16.21	10.28	16.17	5.21149																-0.202	0.202	0.0408041	0.0169891
1	6	1	61	223.7						1	6	1	61	192.913			6	1	223.7	13.572	16.1196	8.82	11.316	3.654		13.37	16.32	8.87003	11.27	4.84252																0.202	0.202	0.0408041	0.0151085
1	6	2	62	242.9						1	6	2	62	205.68			6	2	242.9	9.708	16.2391	11.4	10.776	3.654		9.91	16.44	11.45	10.73	5.25833																-0.202	0.202	0.0408042	0.0203835
1	6	3	63	249.1						1	6	3	63	201.068			6	3	249.1	22.932	22.8204	10.128	12.468	4.074		22.73	22.62	10.08	12.42	5.22731																0.202001	0.202001	0.0408045	0.00888699
1	6	4	64	265.2						1	6	4	64	204.854			6	4	265.2	15.6	19.6956	11.4	12.84	3.654		15.4	19.5	11.35	12.79	5.44505																0.2	0.2	0.0400001	0.012987
2	1	1	11	330						2	1	1	11	197.233			1	1	330	14.16	20.0717	12.72	9.42	4.683		14.36	19.87	12.67	9.47	5.88877																-0.2	0.2	0.0400001	0.0139276
2	1	2	12	200						2	1	2	12	205.291			1	2	200	14.4	18.5699	10.944	13.08	4.704		14.2489	18.7702	10.9905	13.13	4.86174																0.151074	0.151074	0.0228234	0.0106025
2	1	3	13	300						2	1	3	13	197.67			1	3	300	18.492	21.3922	11.4	13.356	5.124		14.1419	18.5919	11.0919	13.4119	5.62484																4.3501	4.3501	18.9234	0.307604
2	1	4	14	200						2	1	4	14	199.66			1	4	200	13.992	19.6846	12.408	11.736	3.591		14.19	19.4797	12.3582	11.6899	4.75517																-0.198003	0.198003	0.0392053	0.0139537
2	2	1	21	200						2	2	1	21	203.107			2	1	200	17.1	18.5001	9.156	14.916	3.024		16.9	18.3	9.2102	14.87	4.8204																0.200001	0.200001	0.0400003	0.0118344
2	2	2	22	200						2	2	2	22	208.01			2	2	200	15.6	21.9154	13.8	7.788	5.754		15.4	21.7195	13.7485	7.84009	4.91318																0.2	0.2	0.0400001	0.012987
2	2	3	23	210						2	2	3	23	202.573			2	3	210	16.572	18.1571	9.12	12.084	5.103		16.37	17.9597	9.18867	12.1318	4.90103																0.202008	0.202008	0.040807	0.0123401
2	2	4	24	170						2	2	4	24	205.631			2	4	170	17.52	18.6022	9	6.504	6.174		17.7219	18.8019	9.0519	8.0481	4.59597																-0.2019	0.2019	0.0407635	0.0113927
2	3	1	31	330						2	3	1	31	216.359			3	1	330	19.8	18.275	7.2	13.176	5.754		19.6	18.47	7.25	13.13	6.25072																0.200001	0.200001	0.0400003	0.0102041
2	3	2	32	320						2	3	2	32	201.311			3	2	320	12.6	15.1609	8.4	12.36	4.494		12.8	15.36	8.45	12.41	5.87521																-0.200002	0.200002	0.0400008	0.0156251
2	3	3	33	270						2	3	3	33	188.204			3	3	270	19.8	22.2705	11.52	16.2	3.654		19.6	22.07	11.47	16.15	5.1735																0.200001	0.200001	0.0400002	0.0102041
2	3	4	34	220						2	3	4	34	219.223			3	4	220	17.34	21.6043	12.36	18.12	6.804		17.14	21.4	12.3099	18.07	5.30686																0.200004	0.200004	0.0400018	0.0116689
2	4	1	41	260						2	4	1	41	226.748			4	1	260	15.9	16.3089	7.548	18.168	5.754		15.6325	15.52	6.82	18.89	5.81218																0.267504	0.267504	0.0715585	0.0171121
2	4	2	42	260						2	4	2	42	200.485			4	2	260	17.76	18.5987	8.844	17.736	5.103		15.9919	17.6819	8.82999	17.3943	5.31519																1.7681	1.7681	3.12618	0.110562
2	4	3	43	200						2	4	3	43	197.476			4	3	200	16.2	21.0465	12.48	15.408	6.174		15.999	21.0199	12.53	15.6899	4.71384																0.200951	0.200951	0.0403813	0.0125602
2	4	4	44	247.7						2	4	4	44	223.01			4	4	247.7	12.852	18.1834	11.508	12.6	5.124		13.05	18.38	11.46	12.55	5.62985																-0.198001	0.198001	0.0392043	0.0151725
2	5	1	51	220.5						2	5	1	51	204.466			5	1	220.5	14.544	14.8031	6.78	6.96	5.754		14.34	15	6.83008	6.95469	5.03212																0.204001	0.204001	0.0416162	0.014226
2	5	2	52	238.8						2	5	2	52	205.485			5	2	238.8	10.704	12.2285	6.432	15.468	6.174		10.9	12.43	6.48	15.42	5.21746																-0.196	0.196	0.0384162	0.0179817
2	5	3	53	263.6						2	5	3	53	222.718			5	3	263.6	13.44	15.3208	8.04	8.892	3.633		13.64	15.52	8.09	8.94	5.7686																-0.2	0.2	0.0400001	0.0146628
2	5	4	54	244.3						2	5	4	54	225.291			5	4	244.3	12.696	17.437	10.8	11.76	4.074		12.9	17.24	10.75	11.81	5.64217																-0.204	0.204	0.0416161	0.015814
2	6	1	61	221.6						2	6	1	61	199.66			6	1	221.6	9.72	15.6912	10.8	12.96	4.704		9.92	15.49	10.75	12.91	4.95116																-0.200001	0.200001	0.0400004	0.0201614
2	6	2	62	255.7						2	6	2	62	202.573			6	2	255.7	11.556	18.2888	12.444	13.8	4.704		11.76	18.49	12.39	13.75	5.31568																-0.204002	0.204002	0.0416168	0.0173471
2	6	3	63	246.2						2	6	3	63	201.311			6	3	246.2	22.116	22.597	10.404	13.86	5.124		21.92	22.4	10.3873	13.81	5.2056																0.196001	0.196001	0.0384163	0.00894164
2	6	4	64	253.6						2	6	4	64	200.485			6	4	253.6	13.14	18.9517	12.156	17.16	4.704		13.34	18.75	12.11	17.11	5.25712																-0.2	0.2	0.0400001	0.0149925
3	1	1	11	280						3	1	1	11	192.913			1	1	280	15.552	20.7773	12.6	13.98	4.788		15.35	20.58	12.55	13.93	5.35335																0.202	0.202	0.040804	0.0131596
3	1	2	12	230						3	1	2	12	207.718			1	2	230	12.708	16.3564	9.624	16.164	5.124		12.91	16.56	9.57	16.11	5.17987																-0.202	0.202	0.0408041	0.0156468
3	1	3	13	320						3	1	3	13	205.68			1	3	320	20.796	22.2777	10.896	17.64	6.174		20.6	22.08	10.85	17.59	5.95789																0.196001	0.196001	0.0384164	0.00951461
3	1	4	14	220						3	1	4	14	204.417			1	4	220	16.464	21.4788	12.78	12.3	4.557		16.66	21.68	12.83	12.35	5.02667																-0.196	0.196	0.0384161	0.0117647
3	2	1	21	190						3	2	1	21	204.223			2	1	190	15.9	16.3311	7.572	11.676	2.814		16.1019	17.8981	7.51812	11.7319	4.7508																-0.2019	0.2019	0.0407635	0.0125389
3	2	2	22	180						3	2	2	22	162.282			2	2	180	18.12	22.8388	13.2	7.8	5.754		17.0019	21.9019	12.8519	7.7481	3.86634																1.1181	1.1181	1.25015	0.0657633
3	2	3	23	210						3	2	3	23	210.34			2	3	210	15.144	17.4303	9.24	12.12	4.62		16.37	17.9597	9.18867	12.1318	5.04801																-1.22599	1.22599	1.50306	0.0748927
3	2	4	24	160						3	2	4	24	222.476			2	4	160	21	21.1987	9.6	7.764	4.704		20.8	21	9.63645	7.81	4.82401																0.200001	0.200001	0.0400003	0.00961542
3	3	1	31	320						3	3	1	31	186.117			3	1	320	18.6	18.1259	7.8	12.792	6.174		18.8019	18.3319	7.7481	11.543	5.58767																-0.201898	0.201898	0.0407629	0.0107382
3	3	2	32	310						3	3	2	32	197.233			3	2	310	14.88	17.2199	9.18	13.8	4.074		14.68	17.02	9.13	13.75	5.7073																0.2	0.2	0.04	0.013624
3	3	3	33	250						3	3	3	33	214.951			3	3	250	15.6	18.3637	9.96	12.192	3.654		15.8019	18.5619	10.0119	11.8319	5.49822																-0.201899	0.201899	0.0407634	0.0127769
3	3	4	34	200						3	3	4	34	214.757			3	4	200	18.384	21.462	11.544	18.36	5.754		18.3505	21.26	11.4899	18.41	5.04088																0.033507	0.033507	0.00112272	0.00182595
3	4	1	41	260						3	4	1	41	226.748			4	1	260	15	14.9041	6.6	18.936	5.754		15.6325	15.52	6.82	18.89	5.81218																-0.632496	0.632496	0.400051	0.0404603
3	4	2	42	260						3	4	2	42	205.485			4	2	260	15.792	17.4775	8.88	16.56	4.62		15.9919	17.6819	8.82999	17.3943	5.40981																-0.1999	0.1999	0.0399599	0.0125001
3	4	3	43	200						3	4	3	43	178.01			4	3	200	16.2	20.991	12.42	15.744	4.704		15.999	21.0199	12.53	15.6899	4.34545																0.200951	0.200951	0.0403813	0.0125602
3	4	4	44	246.2						3	4	4	44	220.534			4	4	246.2	14.4	18.4367	10.8	11.556	6.174		14.2	18.24	10.85	11.61	5.56938																0.2	0.2	0.0400001	0.0140845
3	5	1	51	218.2						3	5	1	51	217.282			5	1	218.2	12.6	13.6626	6.78	7.896	5.754		12.799	13.46	6.72987	7.95	5.25378																-0.198961	0.198961	0.0395856	0.0155451
3	5	2	52	233.9						3	5	2	52	222.913			5	2	233.9	12.744	13.4696	6.48	15.744	4.704		12.94	13.67	6.53	15.69	5.5028																-0.196	0.196	0.038416	0.0151468
3	5	3	53	250.6						3	5	3	53	210.534			5	3	250.6	11.4	14.9009	8.88	8.88	3.738		11.6	15.1	8.93001	8.93	5.42006																-0.200001	0.200001	0.0400004	0.0172415
3	5	4	54	241.1						3	5	4	54	202.136			5	4	241.1	10.86	16.3599	10.8	13.344	5.124		11.06	16.56	10.85	13.29	5.17494																-0.200001	0.200001	0.0400002	0.0180832
3	6	1	61	226.9						3	6	1	61	204.417			6	1	226.9	10.392	13.8656	8.4	10.14	4.704		10.59	14.07	8.35	10.19	5.08927																-0.198	0.198	0.0392042	0.0186969
3	6	2	62	240.5						3	6	2	62	210.34			6	2	240.5	12.372	18.9118	12.6	10.2	4.704		12.17	18.71	12.55	10.25	5.32475																0.202	0.202	0.0408041	0.0165982
3	6	3	63	255.8						3	6	3	63	197.233			6	3	255.8	20.16	21.1055	10.032	12.12	3.654		19.96	20.91	10.08	12.17	5.21553																0.200003	0.200003	0.040001	0.0100202
3	6	4	64	160.6						3	6	4	64	205.485			6	4	160.6	12.828	18.6243	12	12.156	4.704		13.03	18.42	11.95	12.11	4.50793																-0.202	0.202	0.0408041	0.0155027
																	1	1	195.194	14.84	15.6426	7.5	10.8	2.6817		14.64	15.84	7.55017	10.75	2.67438																0.2	0.2	0.04	0.0136612
																	1	2	188.01	14.105	17.3387	9.8	10.6582	2.1189		13.91	17.14	9.75	10.61	2.39168																0.195	0.195	0.038025	0.0140187
																	1	3	198.883	13.96	15.7738	8.2	16.64	2.5977		14.16	15.57	8.14993	16.5899	2.70785																-0.200001	0.200001	0.0400003	0.0141243
																	1	4	192.913	14.38	14.8178	6.9	8.94158	1.8669		14.58	15.02	6.95003	8.99	2.34916																-0.2	0.2	0.04	0.0137174
																	2	1	197.379	13.22	14.7848	7.6	8.08325	2.1525		13.42	14.58	7.54975	8.13002	2.21567																-0.200001	0.200001	0.0400002	0.0149032
																	2	2	198.398	13.88	15.5419	8	13.2332	2.1777		14.08	15.7402	8.0509	13.18	2.18142																-0.2	0.2	0.0400001	0.0142046
																	2	3	205.68	12.25	13.4758	6.8	7.65409	2.2365		12.45	13.68	6.85005	7.70007	2.378																-0.200002	0.200002	0.0400007	0.0160644
																	2	4	207.476	14.85	15.741	7.6	7.22492	2.373		15.05	15.94	7.65034	7.27002	2.22028																-0.2	0.2	0.04	0.013289
																	3	1	210.583	14.4	16.4019	8.6	10.6582	2.4507		14.6	16.2	8.54997	10.71	2.90101																-0.2	0.2	0.0400001	0.0136986
																	3	2	201.068	13.49	15.2206	7.9	14.0915	1.9551		13.69	16.2581	9.75887	14.14	2.72767																-0.200004	0.200004	0.0400017	0.0146095
																	3	3	212.864	12.17	13.7988	7.2	10.6582	1.638		11.97	13.6	7.14993	10.61	2.61719																0.200001	0.200001	0.0400002	0.0167085
																	3	4	206.65	12.09	16.804	10.5	11.9457	2.5326		12.29	16.6	10.4499	11.9	2.2998																-0.200001	0.200001	0.0400002	0.0162734
																	4	1	206.068	12.12	13.6307	7.05	11.8	2.1777		12.32	13.43	6.99972	11.85	2.59903																-0.2	0.2	0.0400001	0.0162338
																	4	2	204.854	11.33	14.1384	8.1	12.4	2.2365		11.5219	14.34	8.04908	12.45	2.63152																-0.191949	0.191949	0.0368443	0.0166594
																	4	3	185.243	9.62	14.1527	9.2	13.8	2.373		9.82	14.35	9.25	13.75	2.14906																-0.2	0.2	0.0400002	0.0203666
																	4	4	208.883	12.5	14.4086	7.65	10.01	2.1777		12.7	14.61	7.59991	10.06	2.54105																-0.200001	0.200001	0.0400003	0.0157481
																	5	1	211.019	14.25	13.9092	6	13.58	2.1777		14.05	14.11	6.05063	13.5299	2.43167																0.200017	0.200017	0.040007	0.0142361
																	5	2	217.767	12	15.0587	8.67	6.17	2.4066		11.8	14.86	8.61998	6.12	2.57119																0.2	0.2	0.0400001	0.0169492
																	5	3	210.534	13	15.3124	8.31	13.16	2.1945		11.7328	15.1081	8.25821	10.7439	2.61867																1.26717	1.26717	1.60571	0.108002
																	5	4	207.136	14	15.6123	8	6.75	1.6926		13.8	15.81	8.05012	6.80001	2.49866																0.200001	0.200001	0.0400002	0.0144928
																	6	1	192.913	16.8	15.1739	5.75	9.5	1.7325		16.6	15.37	5.8	9.55	2.32176																0.2	0.2	0.0400001	0.0120482
																	6	2	205.68	12.6	14.2083	7.37	9.85	1.6926		12.4	14.41	7.4202	9.79997	2.52112																0.2	0.2	0.0400001	0.016129
																	6	3	201.068	11.5	15.0983	9.03	9.82	1.8858		11.7	15.3006	9.08128	9.87038	2.50625																-0.200031	0.200031	0.0400124	0.0170966
																	6	4	204.854	14.2	17.0245	9.4	15.65	1.6926		14	17.22	9.45037	15.6	2.61064																0.200001	0.200001	0.0400003	0.0142858
																	1	1	197.233	14	15.3348	7.7	11.0874	2.3772		13.8	15.13	7.64991	11.14	2.82338																0.2	0.2	0.0400001	0.0144928
																	1	2	205.291	14.8108	16.088	8	11.774	2.1777		14.61	15.89	8.05002	11.82	2.33097																0.200827	0.200827	0.0403313	0.0137458
																	1	3	197.67	13.54	15.9899	8.7	16.6665	2.373		13.6429	15.7899	8.64958	16.72	2.69684																-0.10293	0.10293	0.0105947	0.0075446
																	1	4	199.66	15.47	15.6423	7.1	8.08325	2.0832		15.27	15.8403	7.16156	8.13013	2.27988																0.200004	0.200004	0.0400015	0.0130978
																	2	1	203.107	13.67	15.1412	7.7	8.94158	2.0223		13.87	15.34	7.64976	8.99001	2.31115																-0.2	0.2	0.04	0.0144196
																	2	2	208.01	15.6	17.7533	9.3	12.3749	2.6649		15.8	17.95	9.35006	12.42	2.35563																-0.2	0.2	0.04	0.0126582
																	2	3	202.573	12.63	14.0687	7.2	8.08325	2.3625		12.43	14.27	7.25031	8.02999	2.34981																0.2	0.2	0.04	0.0160901
																	2	4	205.631	15.14	14.5238	6.1	7.22492	2.4381		14.94	14.32	6.04978	7.16998	2.20355																0.200001	0.200001	0.0400005	0.013387
																	3	1	216.359	13.06	15.4308	8.4	9.7999	2.2449		12.86	15.23	8.34999	9.75	2.99692																0.2	0.2	0.04	0.0155521
																	3	2	201.311	13.45	15.8446	8.6	14.9498	2.0811		13.25	15.6385	8.54889	14.9	2.81688																0.200003	0.200003	0.0400013	0.0150946
																	3	3	188.204	11.49	14.9722	8.9	9.7999	1.9257		11.69	15.17	8.95	9.85	2.48045																-0.200001	0.200001	0.0400002	0.0171087
																	3	4	219.223	11.94	15.3287	9	11.5166	2.52		12.14	15.53	9.0501	11.57	2.54438																-0.200003	0.200003	0.0400012	0.0164747
																	4	1	226.748	12.8	15.4633	8.6	7.85	2.6649		12.5981	14.4919	8.55	7.9019	2.78666																0.2019	0.2019	0.0407636	0.0160262
																	4	2	200.485	13	16.0615	9.12	10.9	2.3625		13.2	15.8598	9.06964	10.95	2.54838																-0.2	0.2	0.0400001	0.0151515
																	4	3	197.476	13.41	16.6535	9.5	11.13	2.8581		13.61	16.85	9.44991	11.18	2.26006																-0.2	0.2	0.0400002	0.0146951
																	4	4	223.01	9.66	13.3807	8.34	9.78	2.373		9.86	13.18	8.28998	9.73	2.69924																-0.2	0.2	0.0400002	0.020284
																	5	1	204.466	12.25	14.2434	7.63	12.43	2.6649		12.45	14.44	7.6804	12.38	2.41266																-0.2	0.2	0.04	0.0160643
																	5	2	205.485	11	15.2397	9.5	6.49	2.8581		11.2	15.04	9.44956	6.5401	2.50152																-0.200001	0.200001	0.0400005	0.0178573
																	5	3	222.718	11.81	13.9576	7.6	10.07	2.0391		11.61	13.76	7.65005	10.02	2.76577																0.2	0.2	0.0400001	0.0172266
																	5	4	225.291	12.6	14.3285	7.5	5.42	1.8858		12.8	14.53	7.45	5.47	2.70515																-0.2	0.2	0.04	0.015625
																	6	1	199.66	14.5	14.0558	6	10.98	2.1777		14.3	13.86	5.94998	10.93	2.37384																0.200001	0.200001	0.0400005	0.0139861
																	6	2	202.573	11.5	13.2208	7	10.3	2.1777		11.7	13.4201	7.05011	10.35	2.54861																-0.200003	0.200003	0.0400013	0.0170943
																	6	3	201.311	14.5	17.3855	9.6	13.5	2.373		14.3	17.1894	9.54868	13.4496	2.49583																0.200031	0.200031	0.0400126	0.0139882
																	6	4	200.485	12.45	16.8303	10.3	15.1	2.1777		12.25	16.63	10.2499	15.05	2.52054																0.200002	0.200002	0.0400008	0.0163267
																	1	1	192.913	13.61	16.0309	8.7	10.52	2.4276		13.81	15.83	8.64992	10.57	2.56667																-0.2	0.2	0.04	0.0144823
																	1	2	207.718	14.022	15.6252	8	11.9457	2.373		14.22	15.83	8.05008	12	2.4835																-0.198	0.198	0.0392042	0.0139241
																	1	3	205.68	15.4	18.1909	9.9	16.52	2.4381		15.2	17.99	9.84975	16.4699	2.85652																0.200001	0.200001	0.0400003	0.0131579
																	1	4	204.417	15.19	16.1254	7.8	7.91159	1.6905		15.39	16.33	7.85015	7.96002	2.41005																-0.2	0.2	0.0400001	0.0129955
																	2	1	204.223	13.43	15.3704	8.1	8.08325	1.9866		13.63	15.17	8.15017	8.02999	2.27778																-0.2	0.2	0.04	0.0146735
																	2	2	162.282	14.68	17.861	10	11.774	2.6649		14.88	18.06	9.95	11.72	1.85373																-0.2	0.2	0.04	0.0134409
																	2	3	210.34	13.33	14.0169	6.7	8.08325	2.1399		13.53	14.2202	6.75118	8.1301	2.42028																-0.200007	0.200007	0.0400029	0.0147825
																	2	4	222.476	14.32	16.0775	8.3	7.65409	2.5977		14.52	16.28	8.35002	7.7	2.31288																-0.2	0.2	0.0400001	0.0137741
																	3	1	186.117	14.87	17.4175	9.4	10.6582	2.2281		14.67	17.22	9.34999	10.71	2.67902																0.2	0.2	0.0400001	0.0136333
																	3	2	197.233	14.15	15.7928	8.1	15.4648	2.4066		13.95	15.59	8.15002	15.41	2.73638																0.200001	0.200001	0.0400002	0.014337
																	3	3	214.951	11.77	14.2116	7.9	10.6582	2.0223		11.97	14.41	7.95003	10.71	2.63613																-0.2	0.2	0.0400001	0.0167085
																	3	4	214.757	12.24	15.9671	9.5	11.0016	2.6649		12.44	15.77	9.44997	11.05	2.41686																-0.2	0.2	0.04	0.0160772
																	4	1	226.748	10.96	14.2913	8.5	11.65	2.6649		12.5981	14.4919	8.55	7.9019	2.78666																-1.6381	1.6381	2.68337	0.130028
																	4	2	205.485	11.59	14.217	8.02	13.47	2.4066		11.39	14.1556	8.07115	13.4199	2.59374																0.200001	0.200001	0.0400004	0.0175594
																	4	3	178.01	15.33	17.3914	9.08	14.7	2.1777		15.13	17.59	9.03	14.65	2.08344																0.2	0.2	0.04	0.0132188
																	4	4	220.534	11.72	14.8759	8.65	10.25	2.8581		11.92	15.08	8.70002	10.3	2.67025																-0.200002	0.200002	0.0400007	0.0167787
																	5	1	217.282	11.25	12.4359	6.31	9.73	2.6649		11.45	12.64	6.36012	9.68	2.51893																-0.2	0.2	0.0400002	0.0174673
																	5	2	222.913	13.1	16.0092	9	6.5	2.1777		12.9	15.81	8.94994	6.55001	2.63833																0.2	0.2	0.04	0.0155039
																	5	3	210.534	10.62	13.352	7.7	10.1	1.9425		11.7328	15.1081	8.25821	10.7439	2.59866																-1.11283	1.11283	1.2384	0.0948477
																	5	4	202.136	15.5	16.4923	8	6.47	2.373		15.7	16.69	8.05004	6.52004	2.48113																-0.200002	0.200002	0.0400008	0.012739
																	6	1	204.417	13.5	13.9316	6.5	10.66	2.4066		13.3	13.73	6.44982	10.61	2.44006																0.200001	0.200001	0.0400004	0.0150377
																	6	2	210.34	13.4	14.9366	7.65	11.5	2.1777		13.6	14.74	7.5999	11.55	2.55296																-0.200001	0.200001	0.0400003	0.0147059
																	6	3	197.233	11	14.1298	8.3	10.16	2.1189		11.2	13.93	8.35001	10.11	2.5006																-0.2	0.2	0.0400001	0.0178572
																	6	4	205.485	13.32	16.7117	9.62	15.3	2.4066		13.52	16.51	9.56963	15.25	2.16133																-0.200001	0.200001	0.0400003	0.014793
																	2	2	180	16.3651	17.6224	8.76166	10.2348	2.72329		16.3651	17.6224	8.76166	10.2348	2.72329																0	0	0	0
																	2	2	200	14.123	15.9365	8.17615	11.581	3.08623		14.123	15.9365	8.17615	11.581	3.08623																0	0	0	0
																	2	2	220	13.5861	15.3788	8.65915	11.6906	3.44916	K_VC=2,2	13.5861	15.3788	8.65915	11.6906	3.44916																0	0	0	0
																	2	2	240	14.9048	16.5721	9.50907	14.6584	3.81209	K_VC=2,4	14.9048	16.5721	9.50907	14.6584	3.81209																0	0	0	0
																	2	2	260	17.0758	18.8197	9.6116	17.1976	4.17502	K_VC=4,2	17.0758	18.8197	9.6116	17.1976	4.17502																0	0	0	0
																	2	2	280	16.0364	19.1916	10.1788	15.1884	4.53795	K_VC=4,4	16.0364	19.1916	10.1788	15.1884	4.53795																0	0	0	0
																	2	2	300	14.0896	18.0567	10.1537	13.7237	4.90089	K_VC=6,2	14.0896	18.0567	10.1537	13.7237	4.90089																0	0	0	0
																	2	2	320	17.3581	19.9774	9.35902	15.1589	5.26382	K_VC=6,4	17.3581	19.9774	9.35902	15.1589	5.26382																0	0	0	0
																	2	4	180	17.0958	19.1466	9.53909	9.96133	2.72329		17.0958	19.1466	9.53909	9.96133	2.72329																0	0	0	0
																	2	4	200	14.7766	16.7561	8.81571	12.2415	3.08623		14.7766	16.7561	8.81571	12.2415	3.08623																0	0	0	0
																	2	4	220	14.0962	15.8557	8.91885	11.2782	3.44916		14.0962	15.8557	8.91885	11.2782	3.44916																0	0	0	0
																	2	4	240	15.285	17.7004	10.6836	12.3029	3.81209		15.285	17.7004	10.6836	12.3029	3.81209																0	0	0	0
																	2	4	260	17.5586	21.381	12.1097	13.9461	4.17502		17.5586	21.381	12.1097	13.9461	4.17502																0	0	0	0
																	2	4	280	16.807	22.6796	12.4539	13.1809	4.53795		16.807	22.6796	12.4539	13.1809	4.53795																0	0	0	0
																	2	4	300	15.0364	21.0608	10.7756	14.5473	4.90089		15.0364	21.0608	10.7756	14.5473	4.90089																0	0	0	0
																	2	4	320	18.2299	21.5859	8.81362	18.7994	5.26382		18.2299	21.5859	8.81362	18.7994	5.26382																0	0	0	0
																	4	2	180	14.8998	17.1818	9.08437	11.7878	2.72329		14.8998	17.1818	9.08437	11.7878	2.72329																0	0	0	0
																	4	2	200	13.5502	15.5162	8.05877	11.6038	3.08623		13.5502	15.5162	8.05877	11.6038	3.08623																0	0	0	0
																	4	2	220	12.5044	14.803	8.38774	10.5338	3.44916		12.5044	14.803	8.38774	10.5338	3.44916																0	0	0	0
																	4	2	240	13.256	15.9964	9.16923	13.4863	3.81209		13.256	15.9964	9.16923	13.4863	3.81209																0	0	0	0
																	4	2	260	15.779	17.8195	9.04166	16.5083	4.17502		15.779	17.8195	9.04166	16.5083	4.17502																0	0	0	0
																	4	2	280	15.8176	17.068	9.08229	14.4012	4.53795		15.8176	17.068	9.08229	14.4012	4.53795																0	0	0	0
																	4	2	300	15.0199	15.0972	7.98234	12.3722	4.90089		15.0199	15.0972	7.98234	12.3722	4.90089																0	0	0	0
																	4	2	320	19.2405	17.4952	5.37085	13.9013	5.26382		19.2405	17.4952	5.37085	13.9013	5.26382																0	0	0	0
																	4	4	180	15.4828	18.9834	10.2197	11.7282	2.72329		15.4828	18.9834	10.2197	11.7282	2.72329																0	0	0	0
																	4	4	200	14.0208	16.5933	9.04426	12.4939	3.08623		14.0208	16.5933	9.04426	12.4939	3.08623																0	0	0	0
																	4	4	220	12.8091	15.4474	8.92266	10.3317	3.44916		12.8091	15.4474	8.92266	10.3317	3.44916																0	0	0	0
																	4	4	240	13.4284	17.1775	10.5351	11.2948	3.81209		13.4284	17.1775	10.5351	11.2948	3.81209																0	0	0	0
																	4	4	260	16.0725	20.3464	11.6757	13.3636	4.17502		16.0725	20.3464	11.6757	13.3636	4.17502																0	0	0	0
																	4	4	280	16.4309	20.4826	11.4735	12.4472	4.53795		16.4309	20.4826	11.4735	12.4472	4.53795																0	0	0	0
																	4	4	300	15.8444	18.0242	8.71647	13.2081	4.90089		15.8444	18.0242	8.71647	13.2081	4.90089																0	0	0	0
																	4	4	320	20.0208	19.0378	4.92949	17.5272	5.26382		20.0208	19.0378	4.92949	17.5272	5.26382																0	0	0	0
																	6	2	180	13.5968	16.688	9.2663	13.2798	2.72329		13.5968	16.688	9.2663	13.2798	2.72329																0	0	0	0
																	6	2	200	13.187	15.1605	7.91026	11.5986	3.08623		13.187	15.1605	7.91026	11.5986	3.08623																0	0	0	0
																	6	2	220	11.6444	14.4467	8.26115	9.37255	3.44916		11.6444	14.4467	8.26115	9.37255	3.44916																0	0	0	0
																	6	2	240	11.7973	15.7589	9.1316	12.3024	3.81209		11.7973	15.7589	9.1316	12.3024	3.81209																0	0	0	0
																	6	2	260	14.6131	17.1862	8.83609	15.784	4.17502		14.6131	17.1862	8.83609	15.784	4.17502																0	0	0	0
																	6	2	280	15.6737	15.2559	8.3053	13.5683	4.53795		15.6737	15.2559	8.3053	13.5683	4.53795																0	0	0	0
																	6	2	300	15.986	12.3511	6.03611	10.9777	4.90089		15.986	12.3511	6.03611	10.9777	4.90089																0	0	0	0
																	6	2	320	21.1293	15.1243	1.52659	12.6052	5.26382		21.1293	15.1243	1.52659	12.6052	5.26382																0	0	0	0
																	6	4	180	14.0312	18.7636	10.7576	13.434	2.72329		14.0312	18.7636	10.7576	13.434	2.72329																0	0	0	0
																	6	4	200	13.4742	16.493	9.23998	12.7168	3.08623		13.4742	16.493	9.23998	12.7168	3.08623																0	0	0	0
																	6	4	220	11.7435	15.2574	9.07034	9.38121	3.44916		11.7435	15.2574	9.07034	9.38121	3.44916																0	0	0	0
																	6	4	240	11.7621	16.9904	10.6861	10.2788	3.81209		11.7621	16.9904	10.6861	10.2788	3.81209																0	0	0	0
																	6	4	260	14.7172	19.6737	11.6006	12.7517	4.17502		14.7172	19.6737	11.6006	12.7517	4.17502																0	0	0	0
																	6	4	280	16.129	18.5902	10.8075	11.6715	4.53795		16.129	18.5902	10.8075	11.6715	4.53795																0	0	0	0
																	6	4	300	16.6872	15.1953	6.88057	11.8247	4.90089		16.6872	15.1953	6.88057	11.8247	4.90089																0	0	0	0
																	6	4	320	21.8172	16.5981	1.18971	16.2105	5.26382		21.8172	16.5981	1.18971	16.2105	5.26382																0	0	0	0
																																														Mean Absolute Deviation	MAD=	0.346535	0.346535
																																														Means Square Error	MSE=	0.463164	0.463164
																																														Root Means Square Error	RMSE=	0.680561
																																														Mean Absolute Percentage Error	MAPE=	0.0239304
																																														Mean Percentage Error	MPE=	0.00309776
																																														Residuals Sum of Squares	RSS(SSE)=	66.6956
																																														Mean	Mean=	14.2749
																																														Standard Devision	SD=	2.43405
																																														Coefficient of Variations	C.V=	17.0512
																																														Ratio of Performance to Deviation	RPD=	3.57654
																																														Mean Absolute Deviation	MAD=	0.259901	0.259901
																																														Means Square Error	MSE=	0.347373	0.347373
																																														Root Means Square Error	RMSE=	0.589383
																																														Mean Absolute Percentage Error	MAPE=	0.0179478
																																														Mean Percentage Error	MPE=	0.00232332
																																														Residuals Sum of Squares	RSS(SSE)=	66.6956
																																														Mean	Mean=	14.5322
																																														Standard Devision	SD=	2.43456
																																														Coefficient of Variations	C.V=	16.7529
																																														Ratio of Performance to Deviation	RPD=	4.13069
[truncated: 21 more columns]

## Sheet: Plant Nitrogen
Replication	Fertilizers (A)	Vermicompost (B)	A × B	Seed Nitrogen	Fruit Nitrogen	Leaf Nitrogen	Root Nitrogen		Fariman		Zahak		Replication	Fertilizers (A)	Vermicompost (B)	A × B	Seed Nitrogen	Fruit Nitrogen	Leaf Nitrogen	Root Nitrogen
1	1	1	11	1.91786	0.892857	2.24393	0.735714			%			1	1	1	11	2.08	1.223	3.74235	1.227
1	1	2	12	1.90714	1.16429	2.51	0.757143						1	1	2	12	2.81	1.5602	2.92	0.86
1	1	3	13	1.85714	1.02143	3.54	1.35714						1	1	3	13	2.22	0.931	2.4156	0.792
1	1	4	14	2.1	1.1	2.30929	0.757143						1	1	4	14	2.56	1.329	2.623	0.86
1	2	1	21	1.97857	1.26429	3.03	0.928571						1	2	1	21	2.09	1.2604	5.2948	1.736
1	2	2	22	1.95714	0.95	2.87	1.07143						1	2	2	22	2.38	1.407	3.47	1.3
1	2	3	23	1.83571	0.942857	3.26786	1.07143						1	2	3	23	2.21	1.302	4.11445	1.349
1	2	4	24	1.81429	0.907143	2.57	1.07143						1	2	4	24	2.26	1.373	2.97	1.3
1	3	1	31	1.46429	0.892857	2.39643	0.785714						1	3	1	31	2.41	1.232	3.0012	0.984
1	3	2	32	1.90786	1.02143	2.24393	0.735714						1	3	2	32	2.21	1.435	2.5315	0.83
1	3	3	33	1.89786	0.857143	2.44	0.8						1	3	3	33	2.81	1.26	5.07	1.792
1	3	4	34	1.95714	1.33571	2.39643	0.785714						1	3	4	34	2.86	1.27	2.745	0.9
1	4	1	41	1.83571	1.14286	3.26786	1.07143						1	4	1	41	2.67	1.37	3.94	1.259
1	4	2	42	1.62857	1.14286	2.92	1.28571						1	4	2	42	2.94	1.75	3.58	1.6
1	4	3	43	2.03571	0.864286	2.83214	0.928571						1	4	3	43	2.74	1.55	5.07	1.761
1	4	4	44	1.50714	1.35714	2.68	0.714286						1	4	4	44	2.54	1.66	2.94	0.8
1	5	1	51	1.65	1.09286	2.92	1.28571						1	5	1	51	2.671	1.89	5.04	1.718
1	5	2	52	1.83571	1	2.59	0.735714						1	5	2	52	2.74	1.45	3.03	0.83
1	5	3	53	1.93571	1.28571	2.92	1.28571						1	5	3	53	2.28	1.44	4.1053	1.346
1	5	4	54	1.88571	0.928571	3.11	0.857143						1	5	4	54	2.11	1.39	3.45	1
1	6	1	61	1.81429	0.907143	3.18	0.714286						1	6	1	61	2.57	1.37	2.2387	0.734
1	6	2	62	1.74286	1	2.77	0.742857						1	6	2	62	2.64	1.55	3.06	0.84
1	6	3	63	1.50714	0.857143	2.97	1.07143						1	6	3	63	2.44	1.32	4.93185	1.617
1	6	4	64	1.83571	0.907143	3.02	1.28571						1	6	4	64	2.57	1.99	3.68	1.6
2	1	1	11	1.93571	0.914286	2.17857	0.714286						2	1	1	11	2.15	1.243	3.60205	1.181
2	1	2	12	1.83571	1.09286	2.55	1						2	1	2	12	2.71	1.3276	2.96	1.2
2	1	3	13	1.77143	1.14286	3.61	1.41429						2	1	3	13	2.84	1.079	2.73585	0.897
2	1	4	14	2.07143	1.16429	2.22214	0.728571						2	1	4	14	2.45	1.244	2.501	0.82
2	2	1	21	1.89286	1.28571	3.18	0.714286						2	2	1	21	2.37	1.282	5.4778	1.796
2	2	2	22	1.85714	1	2.87	1.07143						2	2	2	22	2.17	1.447	3.47	1.3
2	2	3	23	1.65	0.95	3.21	0.857143						2	2	3	23	2.31	1.432	3.82775	1.255
2	2	4	24	1.88571	1	2.53	0.714286						2	2	4	24	2.12	1.244	2.94	0.8
2	3	1	31	1.44286	0.878571	2.17857	0.714286						2	3	1	31	2.84	1.135	2.6047	0.854
2	3	2	32	2	0.942857	2.35286	0.771429						2	3	2	32	2.54	1.339	2.684	0.88
2	3	3	33	1.91429	1.07143	2.2875	0.75						2	3	3	33	2.6	1.21	5.0386	1.652
2	3	4	34	1.91429	1.14286	2.20036	0.721429						2	3	4	34	2.86	1.29	2.4705	0.81
2	4	1	41	1.94286	1.14286	3.14	1.35714						2	4	1	41	2.57	1.4	3.94	1.258
2	4	2	42	1.54286	1.14286	3.22	0.728571						2	4	2	42	2.9	1.65	3.5	0.82
2	4	3	43	1.87143	0.857143	3.27	0.742857						2	4	3	43	2.6	1.72	4.90745	1.609
2	4	4	44	1.58571	1.28571	2.79	0.75						2	4	4	44	2.64	1.75	3.09	0.85
2	5	1	51	1.57143	1.14286	3.31	0.757143						2	5	1	51	2.8	1.92	5.063	1.66
2	5	2	52	1.75571	1	2.53	0.714286						2	5	2	52	2.68	1.52	2.94	0.8
2	5	3	53	1.88571	1.35714	3.22	0.728571						2	5	3	53	2.16	1.45	3.98025	1.305
2	5	4	54	1.95857	0.907143	2.92	1.28571						2	5	4	54	2.22	1.52	3.48	1.6
2	6	1	61	1.89286	0.95	2.92	1.28571						2	6	1	61	2.458	1.35	2.5498	0.836
2	6	2	62	1.90714	0.857143	2.49	1.14286						2	6	2	62	2.742	1.44	3.27	1.4
2	6	3	63	1.57143	0.857143	3.14	0.735714						2	6	3	63	2.67	1.62	5.32	1.547
2	6	4	64	1.75	0.807143	3.19	0.75						2	6	4	64	2.45	1.72	3.59	0.85
3	1	1	11	1.83571	0.907143	2.2875	0.75						3	1	1	11	2.2	1.22	3.67525	1.205
3	1	2	12	1.7	1.19286	2.52	0.728571						3	1	2	12	2.45	1.271	2.9	0.82
3	1	3	13	1.76429	1.05	3.54	0.735714						3	1	3	13	2.15	1.722	2.17465	0.713
3	1	4	14	1.54286	1.09286	2.26571	0.742857						3	1	4	14	2.61	1.227	2.562	0.84
3	2	1	21	1.87143	1.28571	2.94	1.35714						3	2	1	21	2.22	1.4084	4.82205	1.581
3	2	2	22	2.03571	1.07143	2.98	0.714286						3	2	2	22	2.31	1.7002	3.44	0.8
3	2	3	23	1.67143	0.978571	3.32	1.28571						3	2	3	23	2.21	1.435	3.7637	1.234
3	2	4	24	1.97857	0.857143	2.53	0.714286						3	2	4	24	2.94	1.3	2.94	0.8
3	3	1	31	1.48571	0.871429	2.44	0.8						3	3	1	31	2.41	1.093	2.9707	0.974
3	3	2	32	2.07857	1.05	2.39643	0.785714						3	3	2	32	2.78	1.278	2.745	0.9
3	3	3	33	1.86429	0.907143	2.37464	0.778571						3	3	3	33	2.21	1.27	5.09	1.539
3	3	4	34	1.8	1.14286	2.44	0.8						3	3	4	34	2.03	1.28	2.806	0.92
3	4	1	41	1.91429	1	3.18	0.714286						3	4	1	41	2.38	1.39	4.08	1.402
3	4	2	42	1.71429	1.07143	2.83214	0.928571						3	4	2	42	2.16	1.79	3.66	1.1
3	4	3	43	1.97857	1.14286	2.7	1.21429						3	4	3	43	2.85	1.59	5.07	1.564
3	4	4	44	1.58571	1.28571	2.27	1.07143						3	4	4	44	2.77	1.65	2.97	1.3
3	5	1	51	1.63214	1	2.83214	0.928571						3	5	1	51	2.91	1.92	4.84	1.52
3	5	2	52	1.91429	0.857143	2.57	1.07143						3	5	2	52	2.52	1.62	2.97	1.3
3	5	3	53	1.83571	1.28571	3.26786	1.07143						3	5	3	53	2.4	1.49	3.8369	1.258
3	5	4	54	1.81429	0.857143	2.74	0.735714						3	5	4	54	2.22	1.32	3.53	0.83
3	6	1	61	1.72857	0.807143	3.26786	1.07143						3	6	1	61	2.68	1.34	2.5742	0.844
3	6	2	62	1.89286	0.785714	2.68	0.714286						3	6	2	62	2.54	1.59	2.94	0.8
3	6	3	63	1.44857	0.857143	3.1	1.21429						3	6	3	63	2.65	1.39	5.13	1.878
3	6	4	64	1.75	0.892857	3.05	1						3	6	4	64	2.45	1.72	3.86	1.2

## Sheet: Plant Phosphorus
Replication	Fertilizers (A)	Vermicompost (B)	A × B	Seed Phosphore	Fruit Phosphore	Leaf Phosphore	Root Phosphorus		Fariman		Zahak		Replication	Fertilizers (A)	Vermicompost (B)	A × B	Seed Phosphore	Fruit Phosphore	Leaf Phosphore	Root Phosphorus
1	1	1	11	26.8782	28.0285	28.6708	22.475			mg per kg			1	1	1	11	20.34	22.9909	16.73	21.71
1	1	2	12	30.6777	28.159	28.5287	27.985						1	1	2	12	19.49	24.2723	18.15	22.92
1	1	3	13	28.6318	27.5645	28.955	25.085						1	1	3	13	23.705	25.4795	17.64	24.06
1	1	4	14	28.0514	28.623	28.7521	26.68						1	1	4	14	18.565	21.2753	14.6	20.09
1	2	1	21	33.2543	23.084	27.1193	30.015						1	2	1	21	19.98	21.9637	21.37	20.74
1	2	2	22	26.5365	22.446	27.3006	23.635						1	2	2	22	19.61	22.6308	21.01	21.37
1	2	3	23	21.0578	23.635	27.4681	13.05						1	2	3	23	15.2337	11.0983	20.83	10.48
1	2	4	24	26.6031	23.171	27.4123	22.765						1	2	4	24	15.78	11.416	18.21	10.78
1	3	1	31	21.4737	27.6225	29.3277	14.935						1	3	1	31	16.3465	12.4962	15.88	11.8
1	3	2	32	27.3676	28.4925	29.3045	25.085						1	3	2	32	17.007	15.9062	16.45	15.02
1	3	3	33	27.2482	28.0865	29.3726	21.75						1	3	3	33	19.66	17.823	19.76	16.83
1	3	4	34	29.748	27.5703	29.3248	31.465						1	3	4	34	20.255	19.8351	16.12	18.73
1	4	1	41	27.8125	31.4215	29.1276	27.55						1	4	1	41	19.995	19.6974	19.773	18.6
1	4	2	42	27.9285	32.4945	29.5032	27.55						1	4	2	42	21.021	19.6974	19.675	18.6
1	4	3	43	27.4517	34.046	29.5423	21.895						1	4	3	43	18.37	15.5673	19.969	14.7
1	4	4	44	33.3667	32.4365	29.3393	36.25						1	4	4	44	22.015	26.0514	19.829	24.6
1	5	1	51	44.0055	23.8815	26.991	55.535						1	5	1	51	32.6681	40.1361	18.703	37.9
1	5	2	52	27.1625	23.2188	27.3064	24.65						1	5	2	52	17.875	17.5794	18.828	16.6
1	5	3	53	30.8983	23.722	27.4536	30.45						1	5	3	53	21.67	21.8154	18.9435	20.6
1	5	4	54	25.3182	23.2232	27.2629	23.2						1	5	4	54	18.5418	16.5204	18.905	15.6
1	6	1	61	26.12	28.5505	28.6368	22.765						1	6	1	61	18.6014	16.2027	20.226	15.3
1	6	2	62	27.982	28.0865	28.7027	24.65						1	6	2	62	18.32	17.5794	20.21	16.6
1	6	3	63	24.4292	28.9565	28.6723	17.69						1	6	3	63	15.485	12.4962	20.257	11.8
1	6	4	64	26.6638	27.376	28.9435	22.765						1	6	4	64	18.7364	16.2027	20.224	15.3
2	1	1	11	26.1901	28.0285	28.6948	22.91						2	1	1	11	21.22	20.7776	20.26	19.62
2	1	2	12	28.5497	28.6375	28.7035	26.535						2	1	2	12	20.145	21.593	15.96	20.39
2	1	3	13	29.8935	27.6225	28.6571	27.55						2	1	3	13	22.75	23.0438	19.97	21.76
2	1	4	14	30.6632	28.681	28.6593	27.985						2	1	4	14	18.587	18.8926	19.46	17.84
2	2	1	21	30.2606	23.142	27.252	30.45						2	2	1	21	19.8277	19.8351	23.5	18.73
2	2	2	22	27.5555	22.446	27.2658	24.65						2	2	2	22	19.6787	20.9894	23.83	19.82
2	2	3	23	21.6319	23.5915	27.3963	14.065						2	2	3	23	15.2089	10.4841	16.35	9.9
2	2	4	24	25.0455	23.171	27.2672	24.65						2	2	4	24	15.395	12.761	14.68	12.05
2	3	1	31	23.1492	27.6515	28.7158	15.515						2	3	1	31	17.4403	13.8094	17.33	13.04
2	3	2	32	29.9943	28.5215	29.3552	23.49						2	3	2	32	16.79	16.4039	18.9	15.49
2	3	3	33	28.0425	28.072	29.857	26.1						2	3	3	33	20.285	18.0242	19.85	17.02
2	3	4	34	29.9218	27.566	29.3132	27.55						2	3	4	34	20.762	18.8926	34.39	17.84
2	4	1	41	30.5675	31.4505	29.1407	27.55						2	4	1	41	19.355	19.6974	19.7895	18.6
2	4	2	42	28.7622	32.4945	29.3509	27.55						2	4	2	42	19.761	19.6974	19.7955	18.6
2	4	3	43	28.1765	34.075	29.3291	21.75						2	4	3	43	19.63	15.4614	19.7635	14.6
2	4	4	44	34.4123	28.072	29.4857	33.35						2	4	4	44	23.715	23.9334	19.765	22.6
2	5	1	51	46.7967	23.867	27.3021	56.55						2	5	1	51	30.325	40.8774	18.7945	38.6
2	5	2	52	25.357	23.2145	27.5261	24.65						2	5	2	52	18.535	17.5794	18.804	16.6
2	5	3	53	30.092	23.693	27.2883	33.35						2	5	3	53	21.28	23.9334	18.894	22.6
2	5	4	54	26.6493	23.171	27.2803	22.765						2	5	4	54	17.2764	16.2027	18.805	15.3
2	6	1	61	25.3192	28.5505	28.6578	23.635						2	6	1	61	18.985	16.8381	19.804	15.9
2	6	2	62	26.0887	28.072	28.7818	21.75						2	6	2	62	19.0054	15.4614	20.245	14.6
2	6	3	63	24.2152	28.9565	28.9043	15.95						2	6	3	63	18.21	11.2254	20.591	10.6
2	6	4	64	25.3257	27.3905	28.6788	20.735						2	6	4	64	16.3745	14.7201	20.216	13.9
3	1	1	11	26.4847	28.0575	28.4838	22.765						3	1	1	11	21.76	20.9576	22.81	19.79
3	1	2	12	29.3392	28.594	28.6259	28.565						3	1	2	12	20.2304	23.3933	19.76	22.09
3	1	3	13	28.4293	27.5935	28.8289	25.665						3	1	3	13	22.8329	24.1664	21.87	22.82
3	1	4	14	28.8027	28.6375	28.7231	26.535						3	1	4	14	18	14.593	18.83	13.78
3	2	1	21	30.9228	23.1275	26.9888	30.45						3	2	1	21	19.03	16.8593	19.19	15.92
3	2	2	22	28.1556	22.4025	27.0526	26.1						3	2	2	22	19.925	18.9667	23.01	17.91
3	2	3	23	21.3168	23.6205	27.3122	13.34						3	2	3	23	15.3596	10.2935	18.95	9.72
3	2	4	24	26.9923	23.1565	27.2912	21.75						3	2	4	24	15.2246	12.1467	19.17	11.47
3	3	1	31	23.1571	27.666	29.1059	15.95						3	3	1	31	16.3723	12.7186	19.28	12.01
3	3	2	32	27.5147	28.478	29.3219	25.665						3	3	2	32	16.54	14.4765	18.7	13.67
3	3	3	33	26.5935	28.072	29.3813	22.765						3	3	3	33	18.91	15.6732	18.08	14.8
3	3	4	34	29.7598	27.5761	29.1261	27.55						3	3	4	34	19.225	17.7277	23.35	16.74
3	4	1	41	28.7565	31.4505	29.1363	24.65						3	4	1	41	20.0133	17.5794	19.644	16.6
3	4	2	42	29.5323	32.5235	29.3357	26.1						3	4	2	42	19.6713	18.6384	19.742	17.6
3	4	3	43	27.0592	34.046	29.1218	27.55						3	4	3	43	19.3517	19.6974	19.882	18.6
3	4	4	44	33.0734	32.4655	29.0362	33.35						3	4	4	44	22.9833	23.9334	19.809	22.6
3	5	1	51	44.4956	23.9105	27.2107	53.65						3	5	1	51	30.6767	38.7594	18.613	36.6
3	5	2	52	27.2845	23.1565	27.3267	21.75						3	5	2	52	19.1383	15.4614	18.657	14.6
3	5	3	53	31.326	23.751	27.2745	30.45						3	5	3	53	21.7383	21.8154	18.836	20.6
3	5	4	54	26.8135	23.2275	27.6058	21.75						3	5	4	54	17.9538	15.4614	18.8215	14.6
3	6	1	61	26.7221	28.4925	28.4903	20.735						3	6	1	61	17.98	14.7201	20.073	13.9
3	6	2	62	26.2673	28.101	28.7303	20.3						3	6	2	62	18.5317	14.4024	20.222	13.6
3	6	3	63	23.7673	29.0145	28.7492	17.835						3	6	3	63	16.2483	12.6021	20.263	11.9
3	6	4	64	26.32	27.3615	28.7201	22.475						3	6	4	64	18.0861	15.9909	20.087	15.1

## Sheet: Plant Potassium
Replication	Fertilizers (A)	Vermicompost (B)	A × B	Seed Potassium	Fruit Potassium	Leaf Potassium	Root Potassium		Fariman		Zahak		Replication	Fertilizers (A)	Vermicompost (B)	A × B	Seed Potassium	Fruit Potassium	Leaf Potassium	Root Potassium
1	1	1	11	13.344	17.8727	10.86	14.16			mg per kg			1	1	1	11	14.84	15.6426	7.5	10.8
1	1	2	12	12.396	16.2621	9.72	14.88						1	1	2	12	14.105	17.3387	9.8	10.6582
1	1	3	13	13.944	18.3911	11.04	16.56						1	1	3	13	13.96	15.7738	8.2	16.64
1	1	4	14	17.4	20.9181	11.58	12.012						1	1	4	14	14.38	14.8178	6.9	8.94158
1	2	1	21	19.5	18.099	7.2	16.296						1	2	1	21	13.22	14.7848	7.6	8.08325
1	2	2	22	16.8	21.6981	12.804	7.404						1	2	2	22	13.88	15.5419	8	13.2332
1	2	3	23	18	19.7828	9.972	15.792						1	2	3	23	12.25	13.4758	6.8	7.65409
1	2	4	24	19.2	20.1427	9.6	8.1						1	2	4	24	14.85	15.741	7.6	7.22492
1	3	1	31	22.56	19.6166	6.9	11.4						1	3	1	31	14.4	16.4019	8.6	10.6582
1	3	2	32	13.92	16.346	8.844	11.82						1	3	2	32	13.49	15.2206	7.9	14.0915
1	3	3	33	16.2	19.5259	10.836	11.784						1	3	3	33	12.17	13.7988	7.2	10.6582
1	3	4	34	19.44	21.8373	11.28	18.78						1	3	4	34	12.09	16.804	10.5	11.9457
1	4	1	41	15.444	15.3199	6.768	19.02						1	4	1	41	12.12	13.6307	7.05	11.8
1	4	2	42	16.776	18.7207	9.6	14.76						1	4	2	42	11.33	14.1384	8.1	12.4
1	4	3	43	15.6	21.2161	13.044	16.536						1	4	3	43	9.62	14.1527	9.2	13.8
1	4	4	44	13.62	17.6905	10.488	11.352						1	4	4	44	12.5	14.4086	7.65	10.01
1	5	1	51	11.772	14.3977	8.1	8.76						1	5	1	51	14.25	13.9092	6	13.58
1	5	2	52	14.796	15.3172	7.176	12.564						1	5	2	52	12	15.0587	8.67	6.17
1	5	3	53	15.48	17.583	9.192	8.928						1	5	3	53	13	15.3124	8.31	13.16
1	5	4	54	11.688	16.4128	10.332	16.224						1	5	4	54	14	15.6123	8	6.75
1	6	1	61	13.572	16.1196	8.82	11.316						1	6	1	61	16.8	15.1739	5.75	9.5
1	6	2	62	9.708	16.2391	11.4	10.776						1	6	2	62	12.6	14.2083	7.37	9.85
1	6	3	63	22.932	22.8204	10.128	12.468						1	6	3	63	11.5	15.0983	9.03	9.82
1	6	4	64	15.6	19.6956	11.4	12.84						1	6	4	64	14.2	17.0245	9.4	15.65
2	1	1	11	14.16	20.0717	12.72	9.42						2	1	1	11	14	15.3348	7.7	11.0874
2	1	2	12	14.4	18.5699	10.944	13.08						2	1	2	12	14.8108	16.088	8	11.774
2	1	3	13	18.492	21.3922	11.4	13.356						2	1	3	13	13.54	15.9899	8.7	16.6665
2	1	4	14	13.992	19.6846	12.408	11.736						2	1	4	14	15.47	15.6423	7.1	8.08325
2	2	1	21	17.1	18.5001	9.156	14.916						2	2	1	21	13.67	15.1412	7.7	8.94158
2	2	2	22	15.6	21.9154	13.8	7.788						2	2	2	22	15.6	17.7533	9.3	12.3749
2	2	3	23	16.572	18.1571	9.12	12.084						2	2	3	23	12.63	14.0687	7.2	8.08325
2	2	4	24	17.52	18.6022	9	6.504						2	2	4	24	15.14	14.5238	6.1	7.22492
2	3	1	31	19.8	18.275	7.2	13.176						2	3	1	31	13.06	15.4308	8.4	9.7999
2	3	2	32	12.6	15.1609	8.4	12.36						2	3	2	32	13.45	15.8446	8.6	14.9498
2	3	3	33	19.8	22.2705	11.52	16.2						2	3	3	33	11.49	14.9722	8.9	9.7999
2	3	4	34	17.34	21.6043	12.36	18.12						2	3	4	34	11.94	15.3287	9	11.5166
2	4	1	41	15.9	16.3089	7.548	18.168						2	4	1	41	12.8	15.4633	8.6	7.85
2	4	2	42	17.76	18.5987	8.844	17.736						2	4	2	42	13	16.0615	9.12	10.9
2	4	3	43	16.2	21.0465	12.48	15.408						2	4	3	43	13.41	16.6535	9.5	11.13
2	4	4	44	12.852	18.1834	11.508	12.6						2	4	4	44	9.66	13.3807	8.34	9.78
2	5	1	51	14.544	14.8031	6.78	6.96						2	5	1	51	12.25	14.2434	7.63	12.43
2	5	2	52	10.704	12.2285	6.432	15.468						2	5	2	52	11	15.2397	9.5	6.49
2	5	3	53	13.44	15.3208	8.04	8.892						2	5	3	53	11.81	13.9576	7.6	10.07
2	5	4	54	12.696	17.437	10.8	11.76						2	5	4	54	12.6	14.3285	7.5	5.42
2	6	1	61	9.72	15.6912	10.8	12.96						2	6	1	61	14.5	14.0558	6	10.98
2	6	2	62	11.556	18.2888	12.444	13.8						2	6	2	62	11.5	13.2208	7	10.3
2	6	3	63	22.116	22.597	10.404	13.86						2	6	3	63	14.5	17.3855	9.6	13.5
2	6	4	64	13.14	18.9517	12.156	17.16						2	6	4	64	12.45	16.8303	10.3	15.1
3	1	1	11	15.552	20.7773	12.6	13.98						3	1	1	11	13.61	16.0309	8.7	10.52
3	1	2	12	12.708	16.3564	9.624	16.164						3	1	2	12	14.022	15.6252	8	11.9457
3	1	3	13	20.796	22.2777	10.896	17.64						3	1	3	13	15.4	18.1909	9.9	16.52
3	1	4	14	16.464	21.4788	12.78	12.3						3	1	4	14	15.19	16.1254	7.8	7.91159
3	2	1	21	15.9	16.3311	7.572	11.676						3	2	1	21	13.43	15.3704	8.1	8.08325
3	2	2	22	18.12	22.8388	13.2	7.8						3	2	2	22	14.68	17.861	10	11.774
3	2	3	23	15.144	17.4303	9.24	12.12						3	2	3	23	13.33	14.0169	6.7	8.08325
3	2	4	24	21	21.1987	9.6	7.764						3	2	4	24	14.32	16.0775	8.3	7.65409
3	3	1	31	18.6	18.1259	7.8	12.792						3	3	1	31	14.87	17.4175	9.4	10.6582
3	3	2	32	14.88	17.2199	9.18	13.8						3	3	2	32	14.15	15.7928	8.1	15.4648
3	3	3	33	15.6	18.3637	9.96	12.192						3	3	3	33	11.77	14.2116	7.9	10.6582
3	3	4	34	18.384	21.462	11.544	18.36						3	3	4	34	12.24	15.9671	9.5	11.0016
3	4	1	41	15	14.9041	6.6	18.936						3	4	1	41	10.96	14.2913	8.5	11.65
3	4	2	42	15.792	17.4775	8.88	16.56						3	4	2	42	11.59	14.217	8.02	13.47
3	4	3	43	16.2	20.991	12.42	15.744						3	4	3	43	15.33	17.3914	9.08	14.7
3	4	4	44	14.4	18.4367	10.8	11.556						3	4	4	44	11.72	14.8759	8.65	10.25
3	5	1	51	12.6	13.6626	6.78	7.896						3	5	1	51	11.25	12.4359	6.31	9.73
3	5	2	52	12.744	13.4696	6.48	15.744						3	5	2	52	13.1	16.0092	9	6.5
3	5	3	53	11.4	14.9009	8.88	8.88						3	5	3	53	10.62	13.352	7.7	10.1
3	5	4	54	10.86	16.3599	10.8	13.344						3	5	4	54	15.5	16.4923	8	6.47
3	6	1	61	10.392	13.8656	8.4	10.14						3	6	1	61	13.5	13.9316	6.5	10.66
3	6	2	62	12.372	18.9118	12.6	10.2						3	6	2	62	13.4	14.9366	7.65	11.5
3	6	3	63	20.16	21.1055	10.032	12.12						3	6	3	63	11	14.1298	8.3	10.16
3	6	4	64	12.828	18.6243	12	12.156						3	6	4	64	13.32	16.7117	9.62	15.3

## Sheet: Fruit Yield
Replication	Fertilizers (A)	Vermicompost (B)	A × B	Fruit Yield		Fariman		Zahak		Replication	Fertilizers (A)	Vermicompost (B)	A × B	Fruit Yield
1	1	1	11	31.9			kg per plant			1	1	1	11	12.77
1	1	2	12	19.4						1	1	2	12	10.09
1	1	3	13	22.4						1	1	3	13	12.37
1	1	4	14	19.2						1	1	4	14	8.89
1	2	1	21	12.4						1	2	1	21	10.25
1	2	2	22	22.4						1	2	2	22	10.37
1	2	3	23	23						1	2	3	23	10.65
1	2	4	24	24.4						1	2	4	24	11.3
1	3	1	31	14.4						1	3	1	31	11.67
1	3	2	32	20.1						1	3	2	32	9.31
1	3	3	33	12.4						1	3	3	33	7.8
1	3	4	34	17.4						1	3	4	34	12.06
1	4	1	41	22.4						1	4	1	41	10.37
1	4	2	42	23						1	4	2	42	10.65
1	4	3	43	24.4						1	4	3	43	11.3
1	4	4	44	22.4						1	4	4	44	10.37
1	5	1	51	22.4						1	5	1	51	10.37
1	5	2	52	24.4						1	5	2	52	11.46
1	5	3	53	26.9						1	5	3	53	10.45
1	5	4	54	17.4						1	5	4	54	8.06
1	6	1	61	17.4						1	6	1	61	8.25
1	6	2	62	17.4						1	6	2	62	8.06
1	6	3	63	19.4						1	6	3	63	8.98
1	6	4	64	17.4						1	6	4	64	8.06
2	1	1	11	22.3						2	1	1	11	11.32
2	1	2	12	22.4						2	1	2	12	10.37
2	1	3	13	24.4						2	1	3	13	11.3
2	1	4	14	17.1						2	1	4	14	9.92
2	2	1	21	14.4						2	2	1	21	9.63
2	2	2	22	27.4						2	2	2	22	12.69
2	2	3	23	24.3						2	2	3	23	11.25
2	2	4	24	29.4						2	2	4	24	11.61
2	3	1	31	27.4						2	3	1	31	10.69
2	3	2	32	21.4						2	3	2	32	9.91
2	3	3	33	17.4						2	3	3	33	9.17
2	3	4	34	32.4						2	3	4	34	12
2	4	1	41	27.4						2	4	1	41	12.69
2	4	2	42	24.3						2	4	2	42	11.25
2	4	3	43	29.4						2	4	3	43	13.61
2	4	4	44	24.4						2	4	4	44	11.3
2	5	1	51	27.4						2	5	1	51	12.69
2	5	2	52	29.4						2	5	2	52	13.61
2	5	3	53	17.3						2	5	3	53	9.71
2	5	4	54	19.4						2	5	4	54	8.98
2	6	1	61	22.4						2	6	1	61	10.37
2	6	2	62	22.4						2	6	2	62	10.37
2	6	3	63	24.4						2	6	3	63	11.3
2	6	4	64	22.4						2	6	4	64	10.37
3	1	1	11	22.8						3	1	1	11	11.56
3	1	2	12	24.4						3	1	2	12	11.3
3	1	3	13	29.4						3	1	3	13	11.61
3	1	4	14	21.7						3	1	4	14	8.05
3	2	1	21	13.4						3	2	1	21	9.46
3	2	2	22	27.4						3	2	2	22	12.69
3	2	3	23	22						3	2	3	23	10.19
3	2	4	24	22.4						3	2	4	24	12.37
3	3	1	31	29.4						3	3	1	31	10.61
3	3	2	32	19.4						3	3	2	32	11.46
3	3	3	33	17.4						3	3	3	33	9.63
3	3	4	34	27.4						3	3	4	34	12.69
3	4	1	41	27.4						3	4	1	41	12.69
3	4	2	42	22						3	4	2	42	11.46
3	4	3	43	22.4						3	4	3	43	10.37
3	4	4	44	29.4						3	4	4	44	13.61
3	5	1	51	27.4						3	5	1	51	12.69
3	5	2	52	22.4						3	5	2	52	10.37
3	5	3	53	17.8						3	5	3	53	9.25
3	5	4	54	24.4						3	5	4	54	11.3
3	6	1	61	22.4						3	6	1	61	11.46
3	6	2	62	22.4						3	6	2	62	10.37
3	6	3	63	17.4						3	6	3	63	10.09
3	6	4	64	22.4						3	6	4	64	11.46
														0.05
														0.2
														0.35
														0.5
														0.65
														0.8
														0.95
														1.1
